# Supplementary material
Source: PubMed Central journal article supplement (PMC3891892)
Supplement: NIHMS496958-supplement-1.pdf [file NIHMS496958-supplement-1.pdf]

## **Supplementary Information**

- **Supplementary Results**
- **Supplementary Figures**
- **Supplementary Tables**
- **Supplementary References**

## **Supplementary Results**

### **Chemokine/cytokine levels in Anhui/1- or Dk/GM466- infected macaques**

At 3 dpi, the levels of proinflammatory cytokines such as IL-1 $\beta$ , IL-6, TNF $\alpha$ , and IL-18 were upregulated in the lungs of animals infected with Anhui/1 or Dk/GM466 (Figure S9). By 6 dpi, inflammatory responses were suppressed, but IFN $\gamma$  levels were elevated in the lungs of Anhui/1-infected macaques, indicating T cell-mediated antiviral responses. To analyze systemic host responses, we assessed cytokine concentrations in the serum of infected animals. The levels of IL-6, monocyte chemoattractant protein-1 (MCP-1: CCL2), IL-15, IL-10, and IL1Ra were transiently increased at 1 dpi, particularly after infection with Anhui/1 (Figure S9). Thus, Anhui/1 appears to induce strong inflammatory responses both systemically and at the site of virus infection.

### **Infection of miniature pigs with Anhui/1 or Dk/GM466 viruses**

Pigs occupy a unique role in influenza virus ecology because they may serve as “mixing vessels” in which human and avian influenza viruses reassort. In fact, the 2009 H1N1 pandemic influenza virus likely emerged from reassortment in pigs. Specific-pathogen-free miniature pigs intranasally infected with 10<sup>7</sup> PFU of Anhui/1 or Dk/GM466 showed no signs of disease, consistent with a lack of efficient virus replication (Tables S10, S11). Mild pathological changes were observed throughout the lung except in the right upper lobules, where focal severe alveolar damage was observed (Figure S11). Viral antigen was detected in the tracheal, bronchial, bronchiolar, and alveolar epithelia of Anhui/1-infected pigs; few viral antigens were detected in Dk/GM466-infected pigs. Apparently, infections with Anhui/1 and

Dk/GM466, but also with pandemic 2009 H1N1 CA04, seasonal H1N1 (A/Kawasaki/UTK-4/2009), and avian H5N1 viruses do not cause severe disease in pigs.

### **Infection of chickens and quail with Anhui/1 or Dk/GM466 viruses**

A(H7N9) viruses have been isolated from poultry in live bird markets in Eastern China<sup>1</sup>. Chickens and quails infected with Anhui/1 or Dk/GM466 did not display signs of disease. Higher titres of virus were recovered from tracheal than from cloacal swabs for both viruses in quails and chickens. Virus titres were higher in quail than in chicken samples. However, both viruses were recovered from only a limited number of organs (Tables S12–15). These virological findings and the lack of multiple basic amino acids at the HA cleavage site – a hallmark of highly pathogenic avian influenza viruses such as the currently circulating avian H5N1 viruses – clearly establish A(H7N9) viruses as low pathogenic avian influenza viruses. The lack of detectable disease symptoms in poultry greatly hampers the detection of these viruses through routine surveillance.

**a. MDCK cells**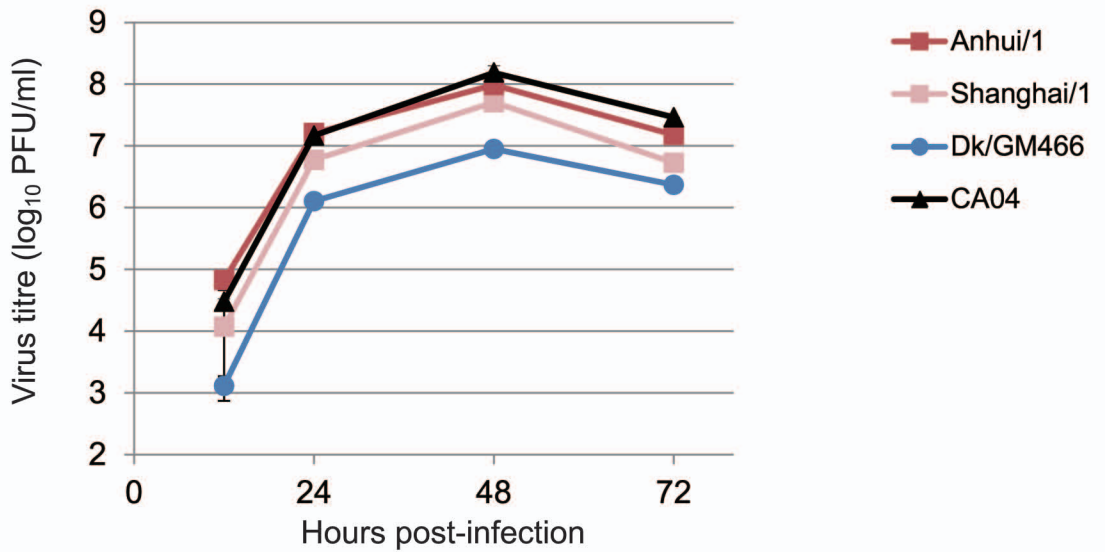**b. Differentiated NHBE cells**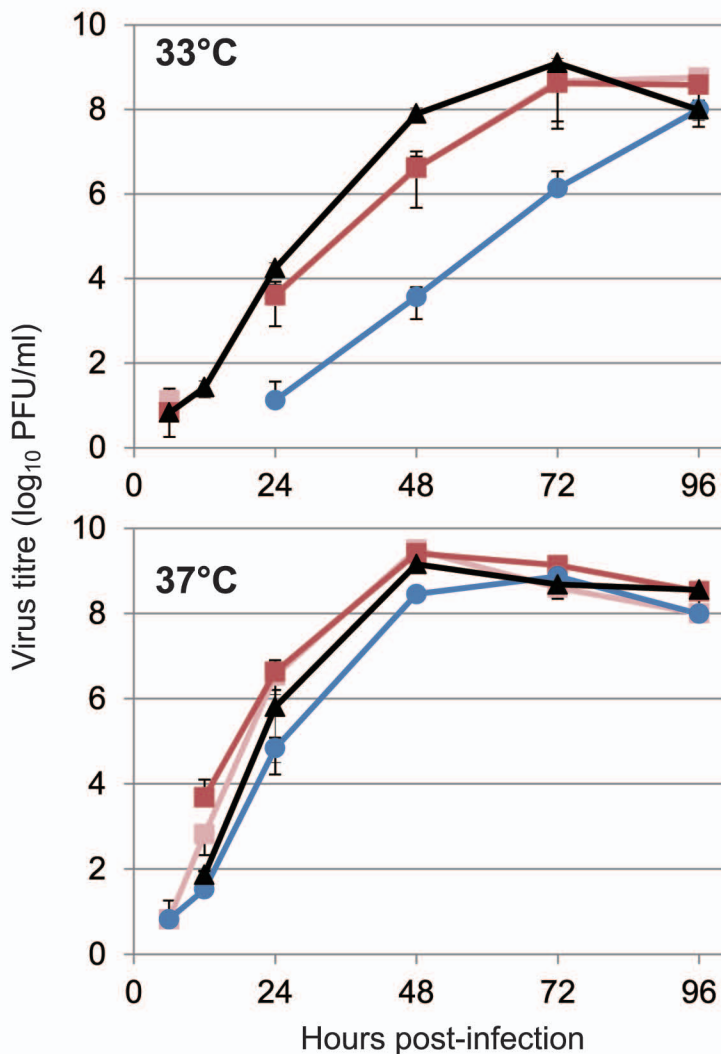

**Supplementary Figure S1. Growth kinetics of viruses in cells.** MDCK (a) or differentiated NHBE (b) cells were infected with Anhui/1 (red), Shanghai/1 (light red), Dk/GM466 (blue), or CA04 (black) at an MOI of 0.01 (MDCK) or 0.001 (differentiated NHBE), respectively. The supernatants of infected cells were harvested at the indicated times and virus titres were determined by plaque assays in MDCK cells. Error bars indicate standard deviations from three independent experiments.

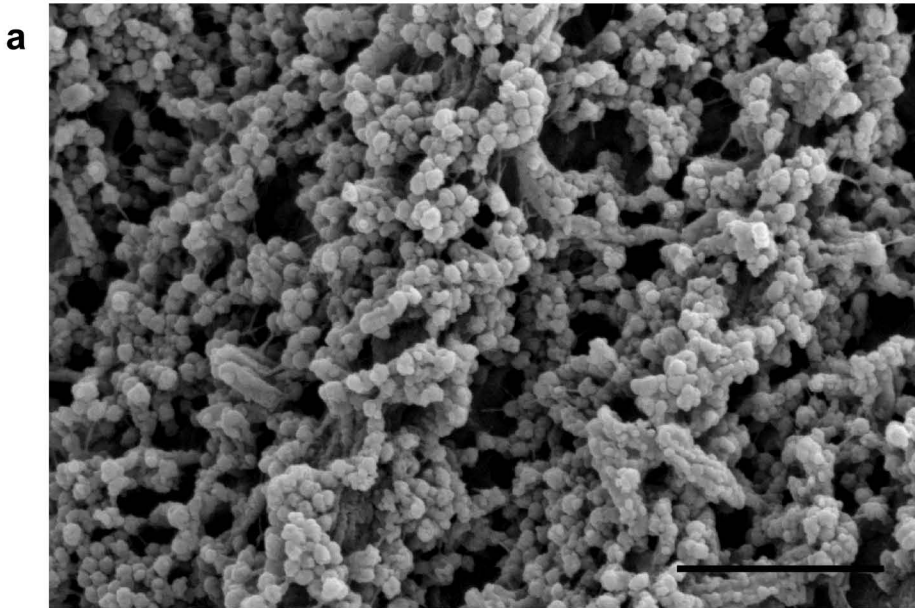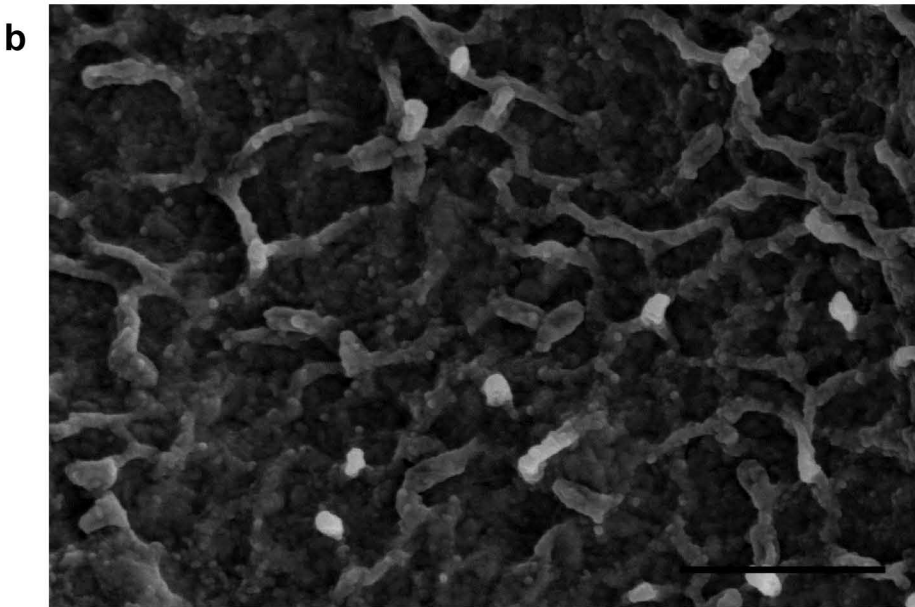

**Supplementary Figure S2. Morphology of budding Anhui/1 virions.** Cells of the allantoic membrane of Anhui/1-infected (a) and mock-infected (b) embryonated chicken eggs were observed by means of scanning electron microscopy. Bars, 1  $\mu$ m. Virus-infected cells of the allantoic membrane were examined by using transmission electron microscopy (c). Bar, 200 nm.

c

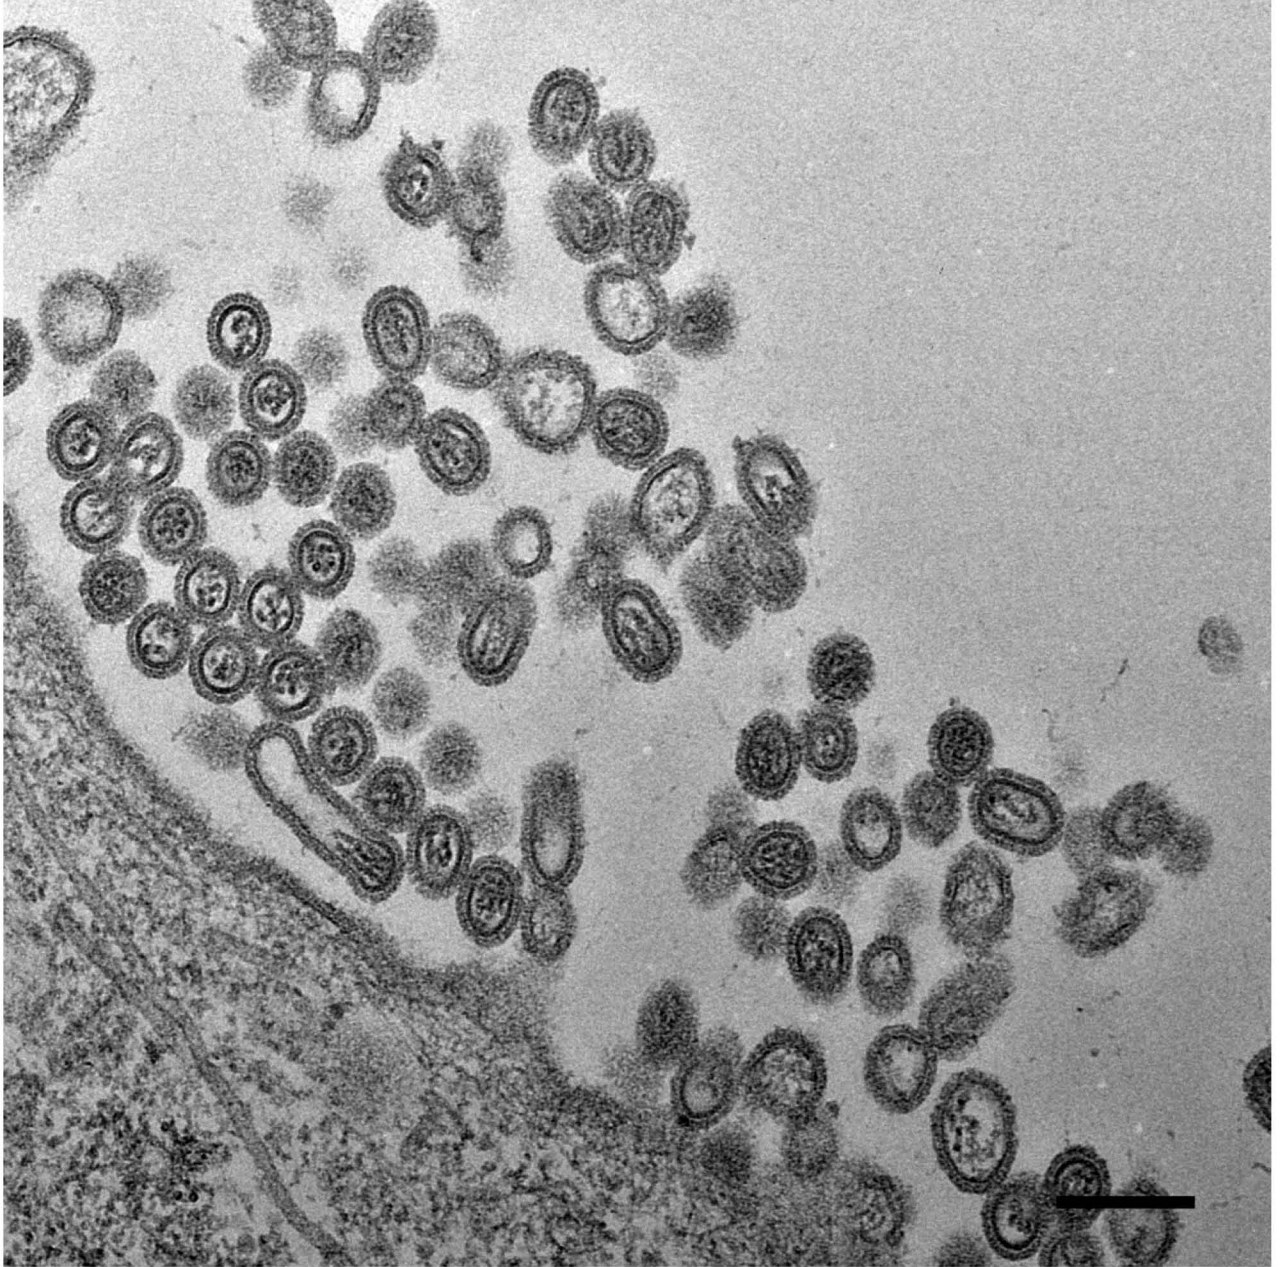

**a. Anhui/1**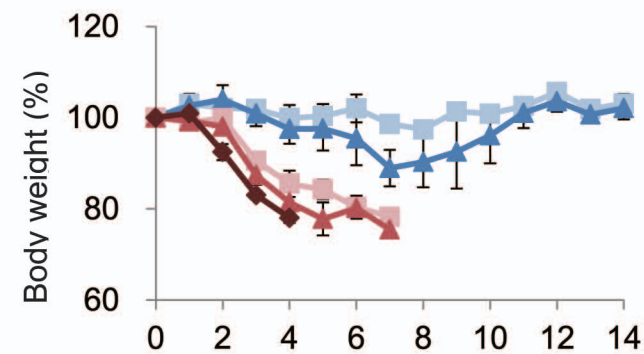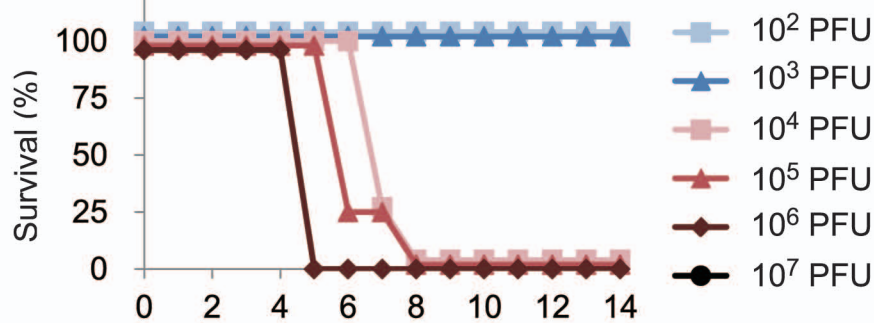**b. Shanghai/1**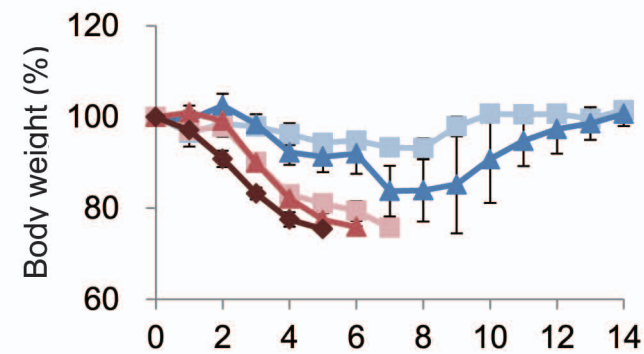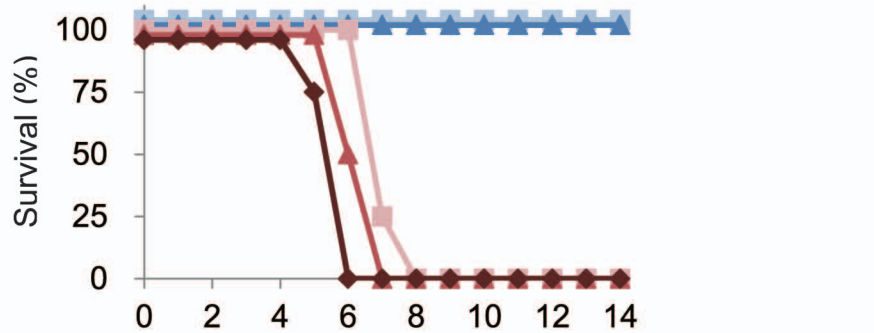**c. Dk/GM466**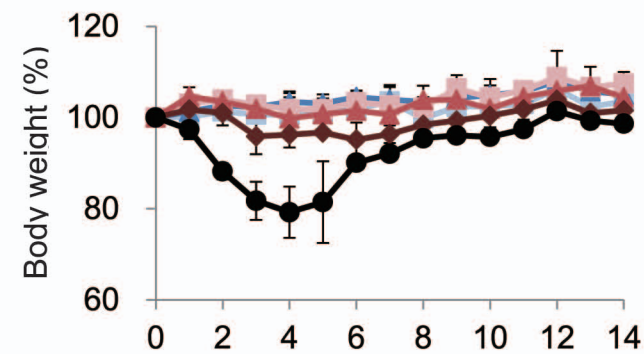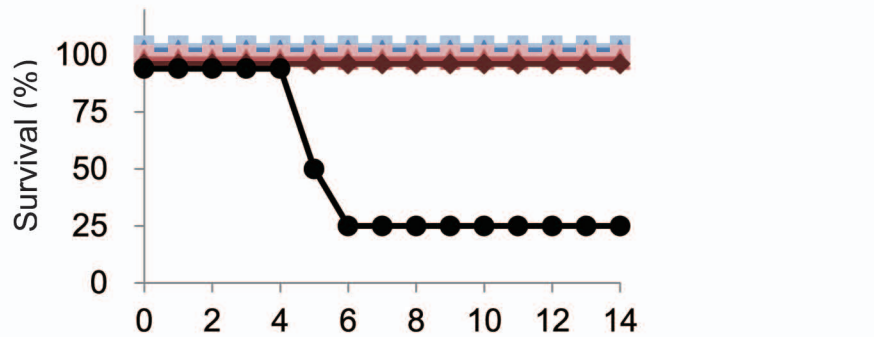**d. CA04**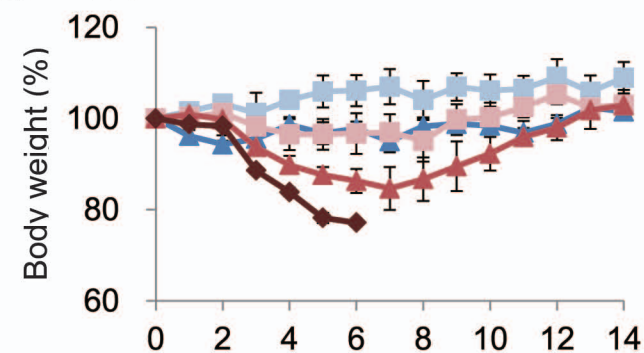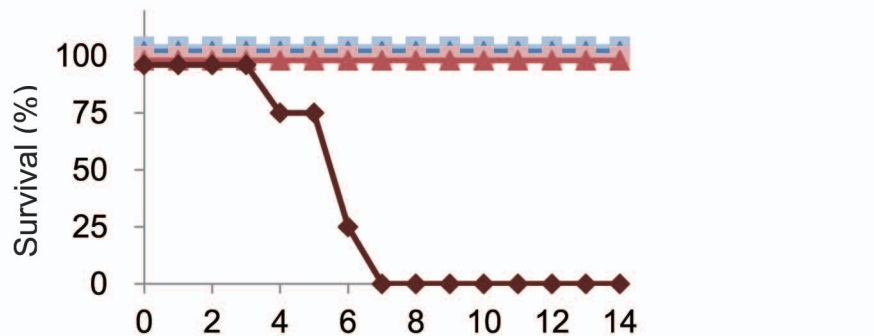

Days post-infection

**Supplementary Figure S3. Pathogenicity in mice.** Four mice per group were intranasally inoculated with  $10^2$ ,  $10^3$ ,  $10^4$ ,  $10^5$ ,  $10^6$ , or  $10^7$  PFU (each in 50  $\mu$ l;  $10^7$  PFU applies only to Dk/GM466) of Anhui/1 (a), Shanghai/1 (b), Dk/GM466 (c), or CA04 (d). Body weight (left panels) and survival (right panels) were monitored daily. The values for body weights are means  $\pm$  SD from live mice.



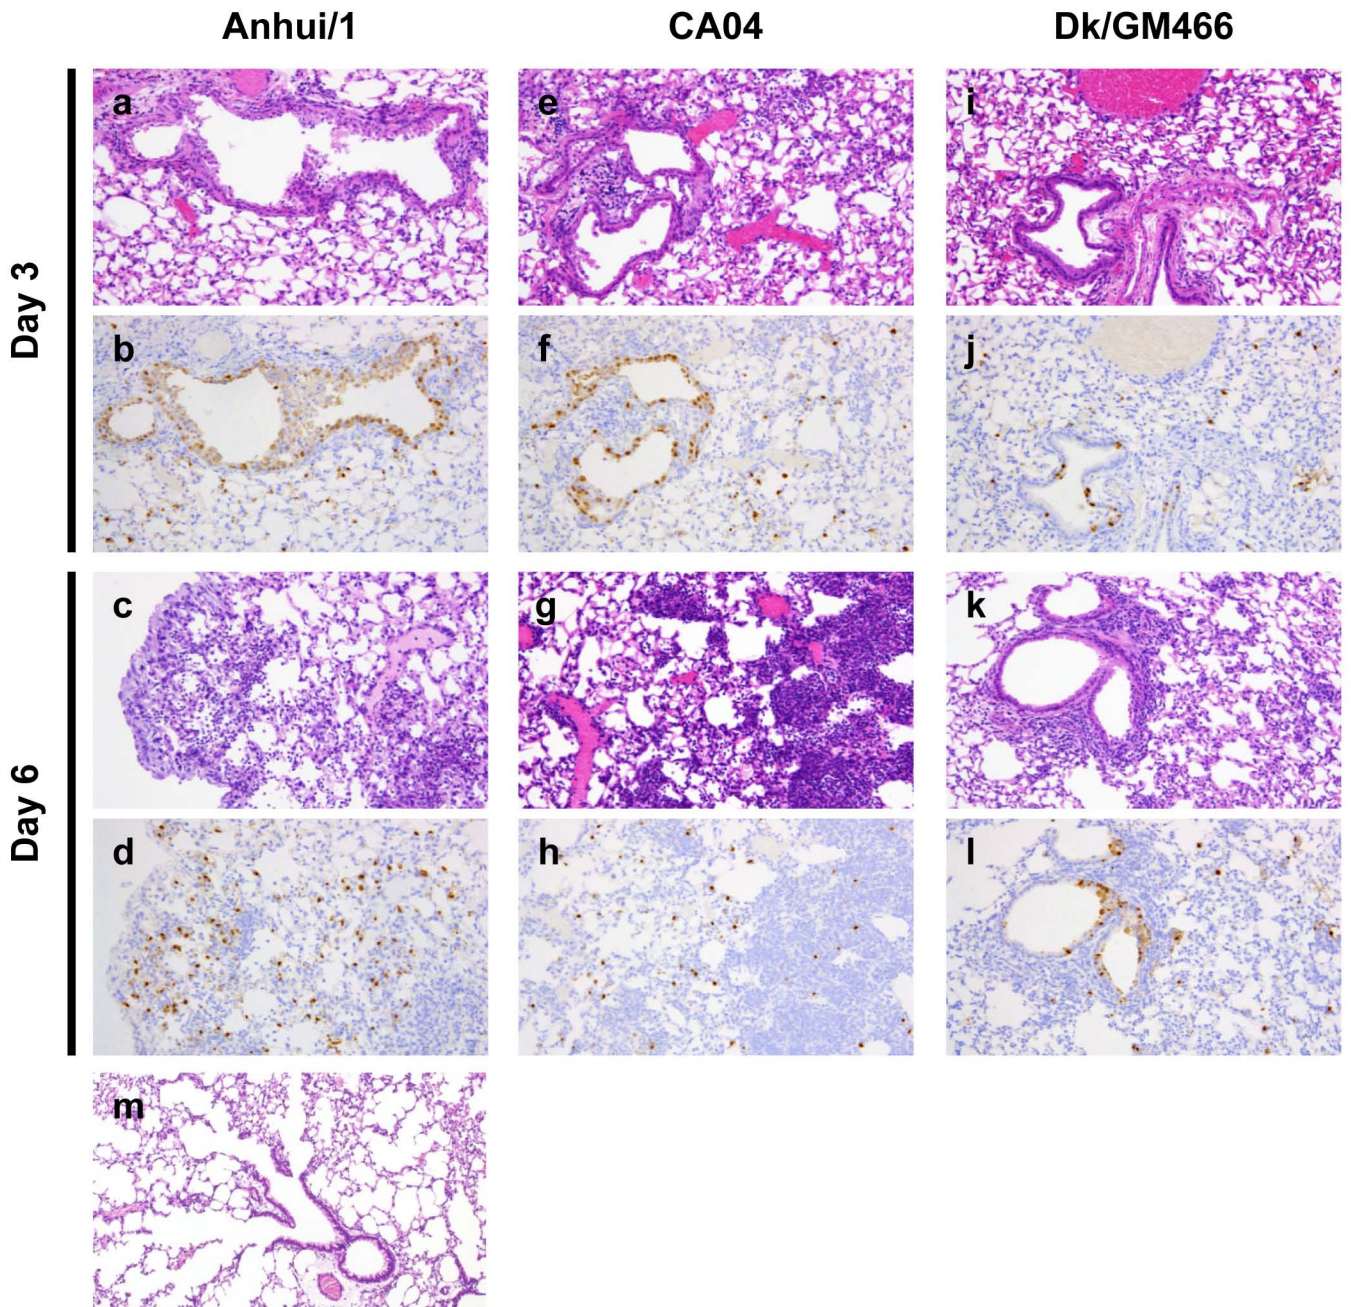

**Supplementary Figure S4. Pathological findings in infected mice.** Shown are representative pathological findings in the lungs of mice infected with Anhui/1 (a–d), CA04 (e–h), or Dk/GM466 (i–l) at 3 (a, b, e, f, i, j) and 6 (c, d, g, h, k, l) dpi with hematoxylin-eosin (HE) staining (a, c, e, g, i, k) and immunohistochemistry for influenza viral antigen (NP) (b, d, f, h, j, l).



**Anhui/1**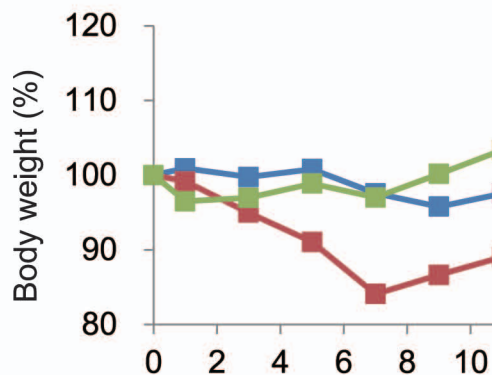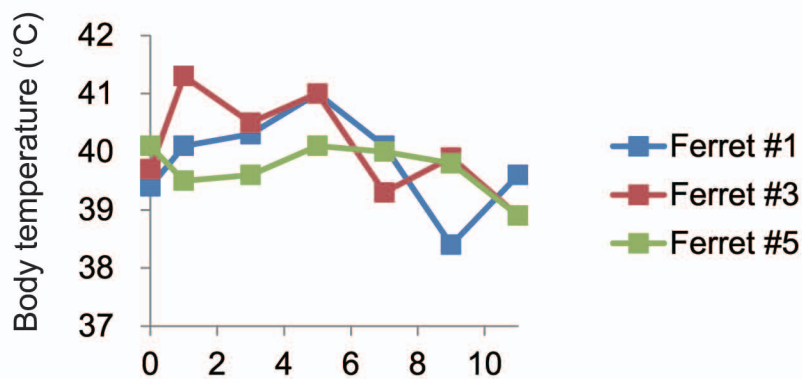**Dk/GM466**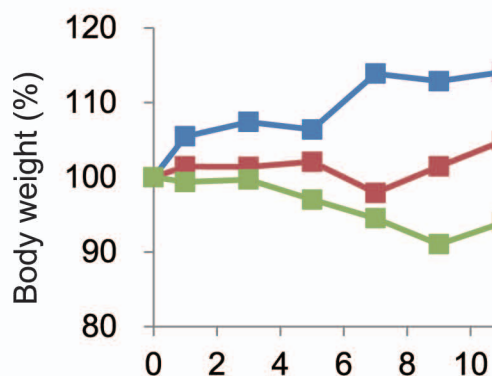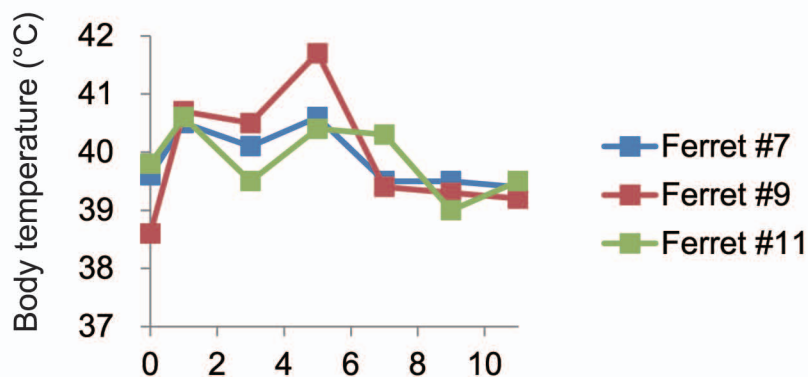**CA04**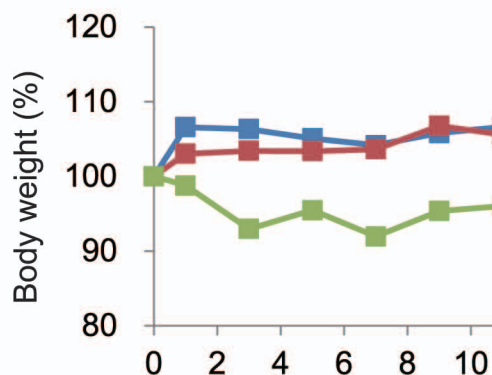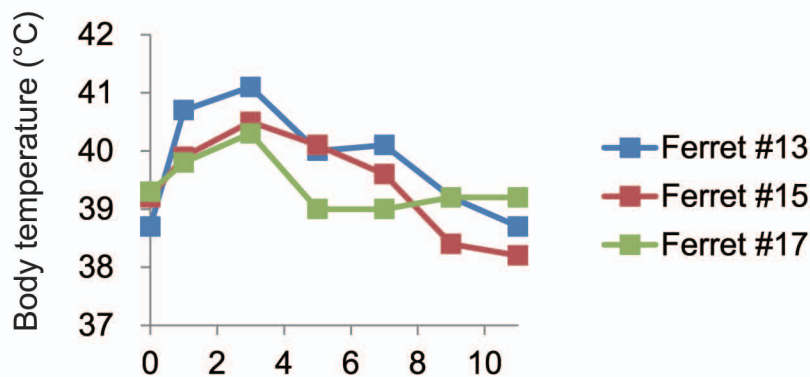

Days post-infection

**Supplementary Figure S5. Body weights and temperatures of ferrets.** Three ferrets per group were intranasally inoculated with  $5 \times 10^5$  PFU (0.5 ml) of Anhui/1, Dk/GM466, or CA04. Body weights (left panels) and temperatures (right panels) were measured at 1, 3, 5, 7, 9, and 11 dpi.

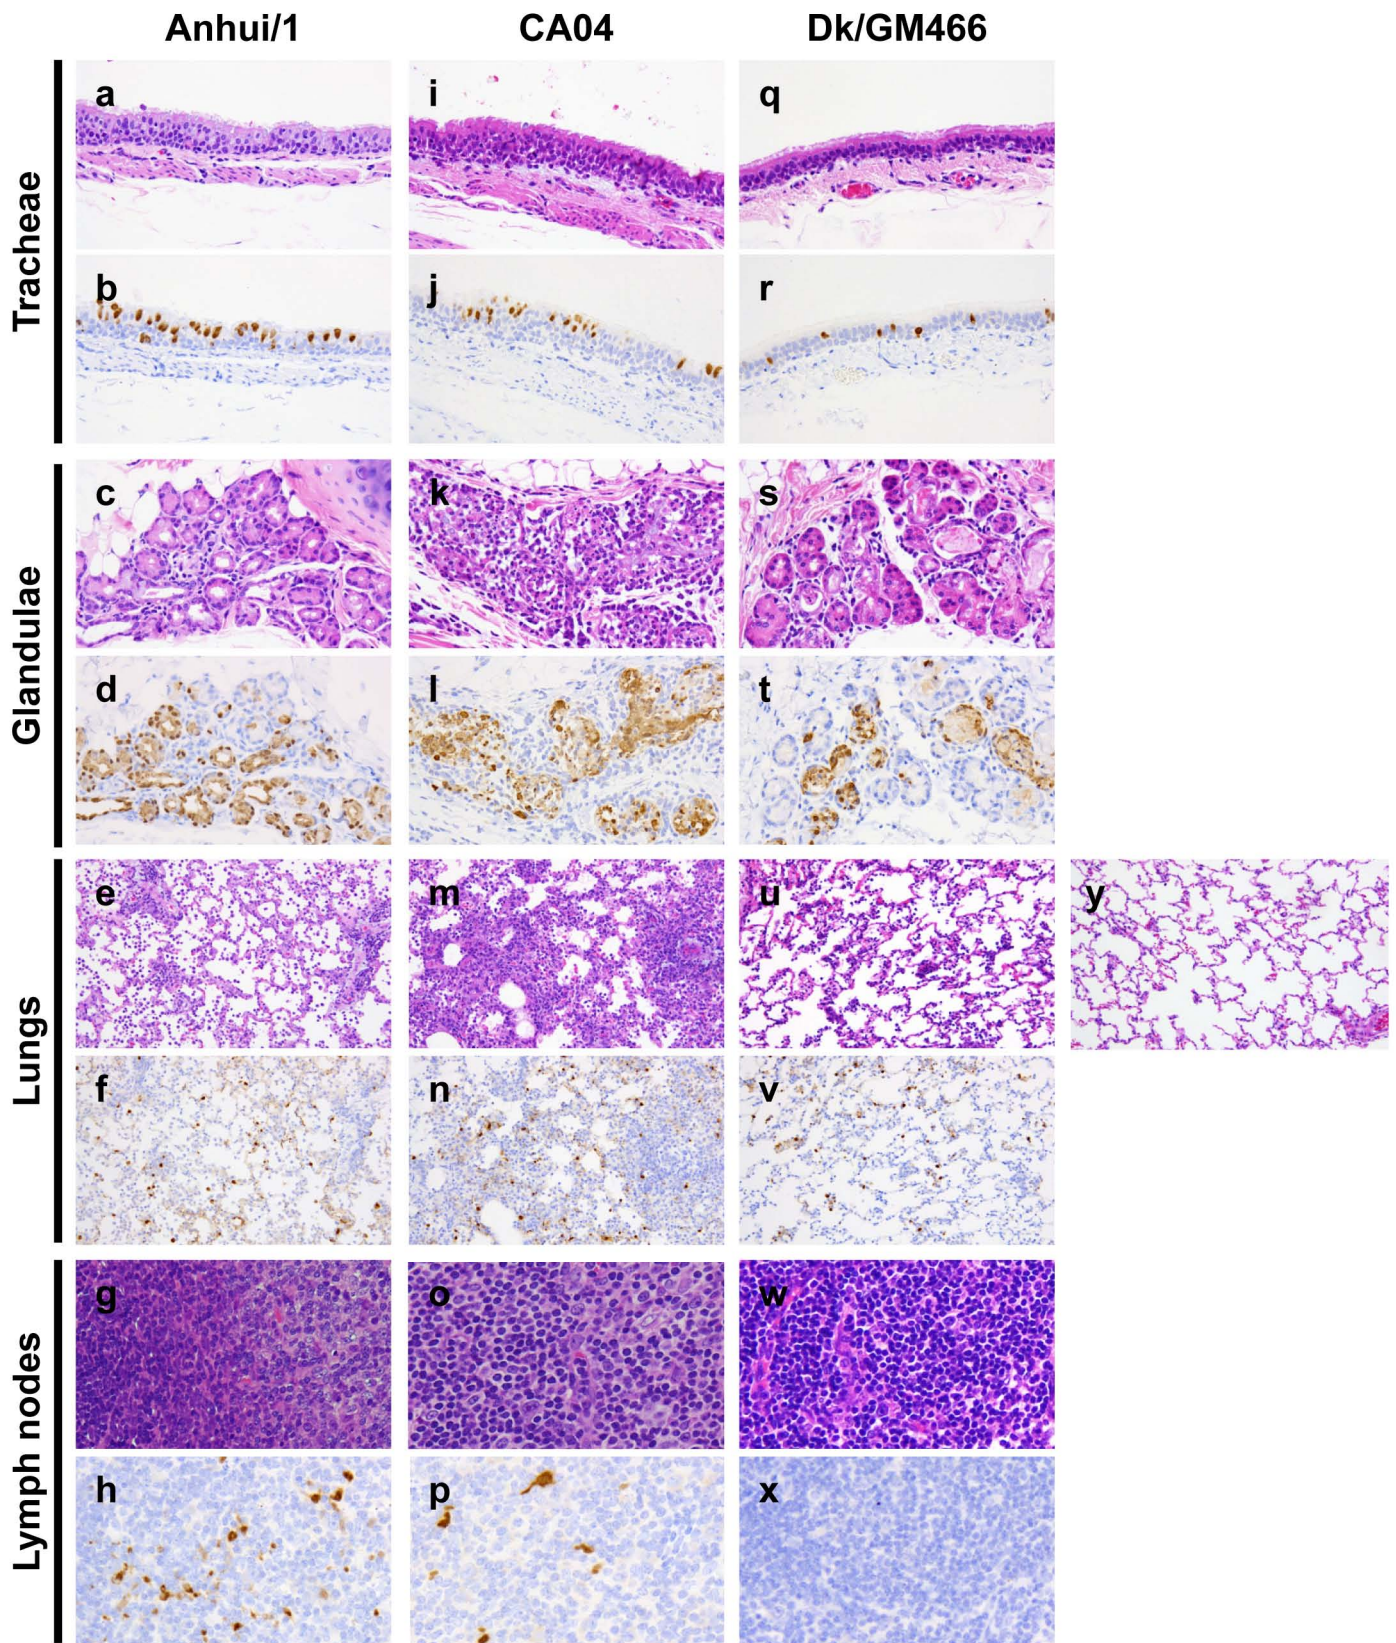

**Supplementary Figure S6. Pathological findings in infected ferrets.** Shown are representative pathological findings in the tracheae (a, b, i, j, g, r), glandulae (c, d, k, l, s, t), lungs (e, f, m, n, u, v), and mediastinum lymph nodes (g, h, o, p, w, x) of ferrets infected with Anhui/1 (a–h), CA04 (i–p), or Dk/GM466 (q–x) at 3 dpi with HE staining (a, c, e, g, i, k, m, o, q, s, u, w) or with immunohistochemistry for influenza viral antigen (b, d, f, h, j, l, n, p, r, t, v, x).



**a. Anhui/1**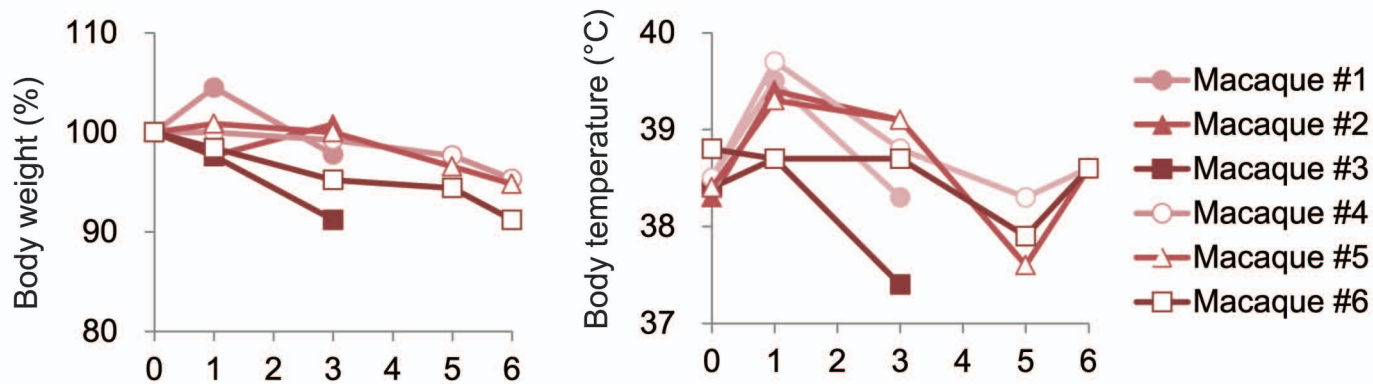**b. Dk/GM466**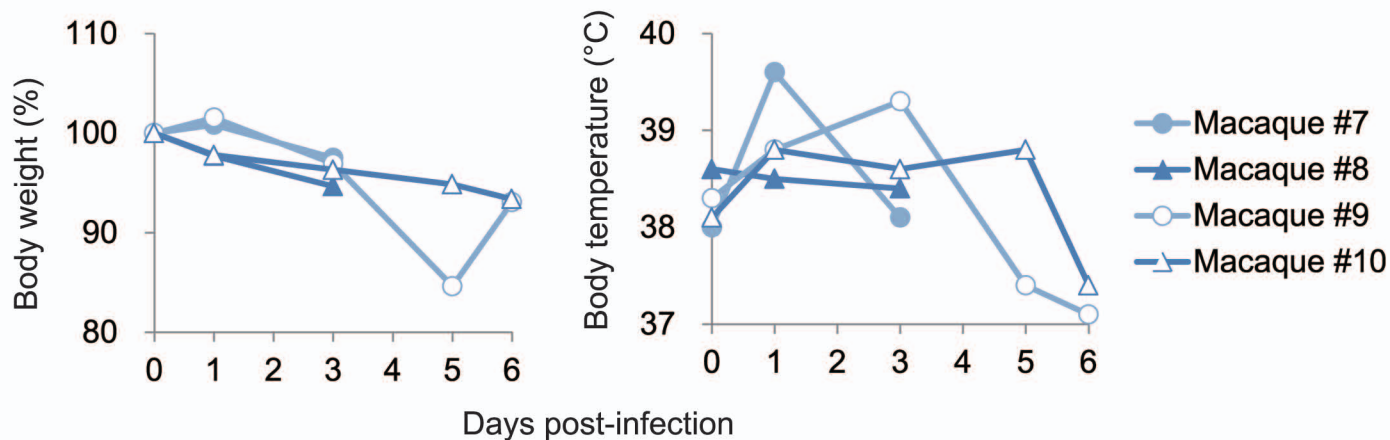

**Supplementary Figure S7. Body weights and temperatures of infected cynomolgus macaques.** Six and four macaques were inoculated with  $6.7 \times 10^7$  PFU (total volume: 6.7 ml) of Anhui/1 (a) or Dk/GM466 (b), respectively, through multiple routes (see Supplementary Materials and Methods). Body weights (left panels) and temperatures (right panels) were measured at 0, 1, 3, 5, and 6 dpi.

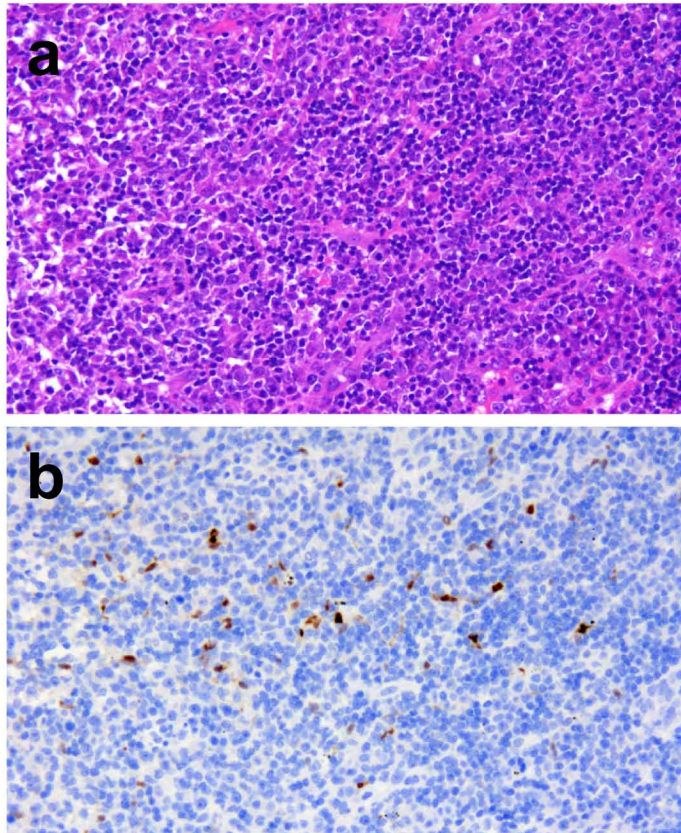

**Supplementary Figure S8. Pathological findings in the mediastinum lymph nodes of Anhui/1-infected macaque at 6 dpi.** Viral antigen-positive cells were detected in the mediastinal lymph node section without prominent pathological change. HE staining (a) and immunohistochemistry for influenza viral antigen (b).



**a-1**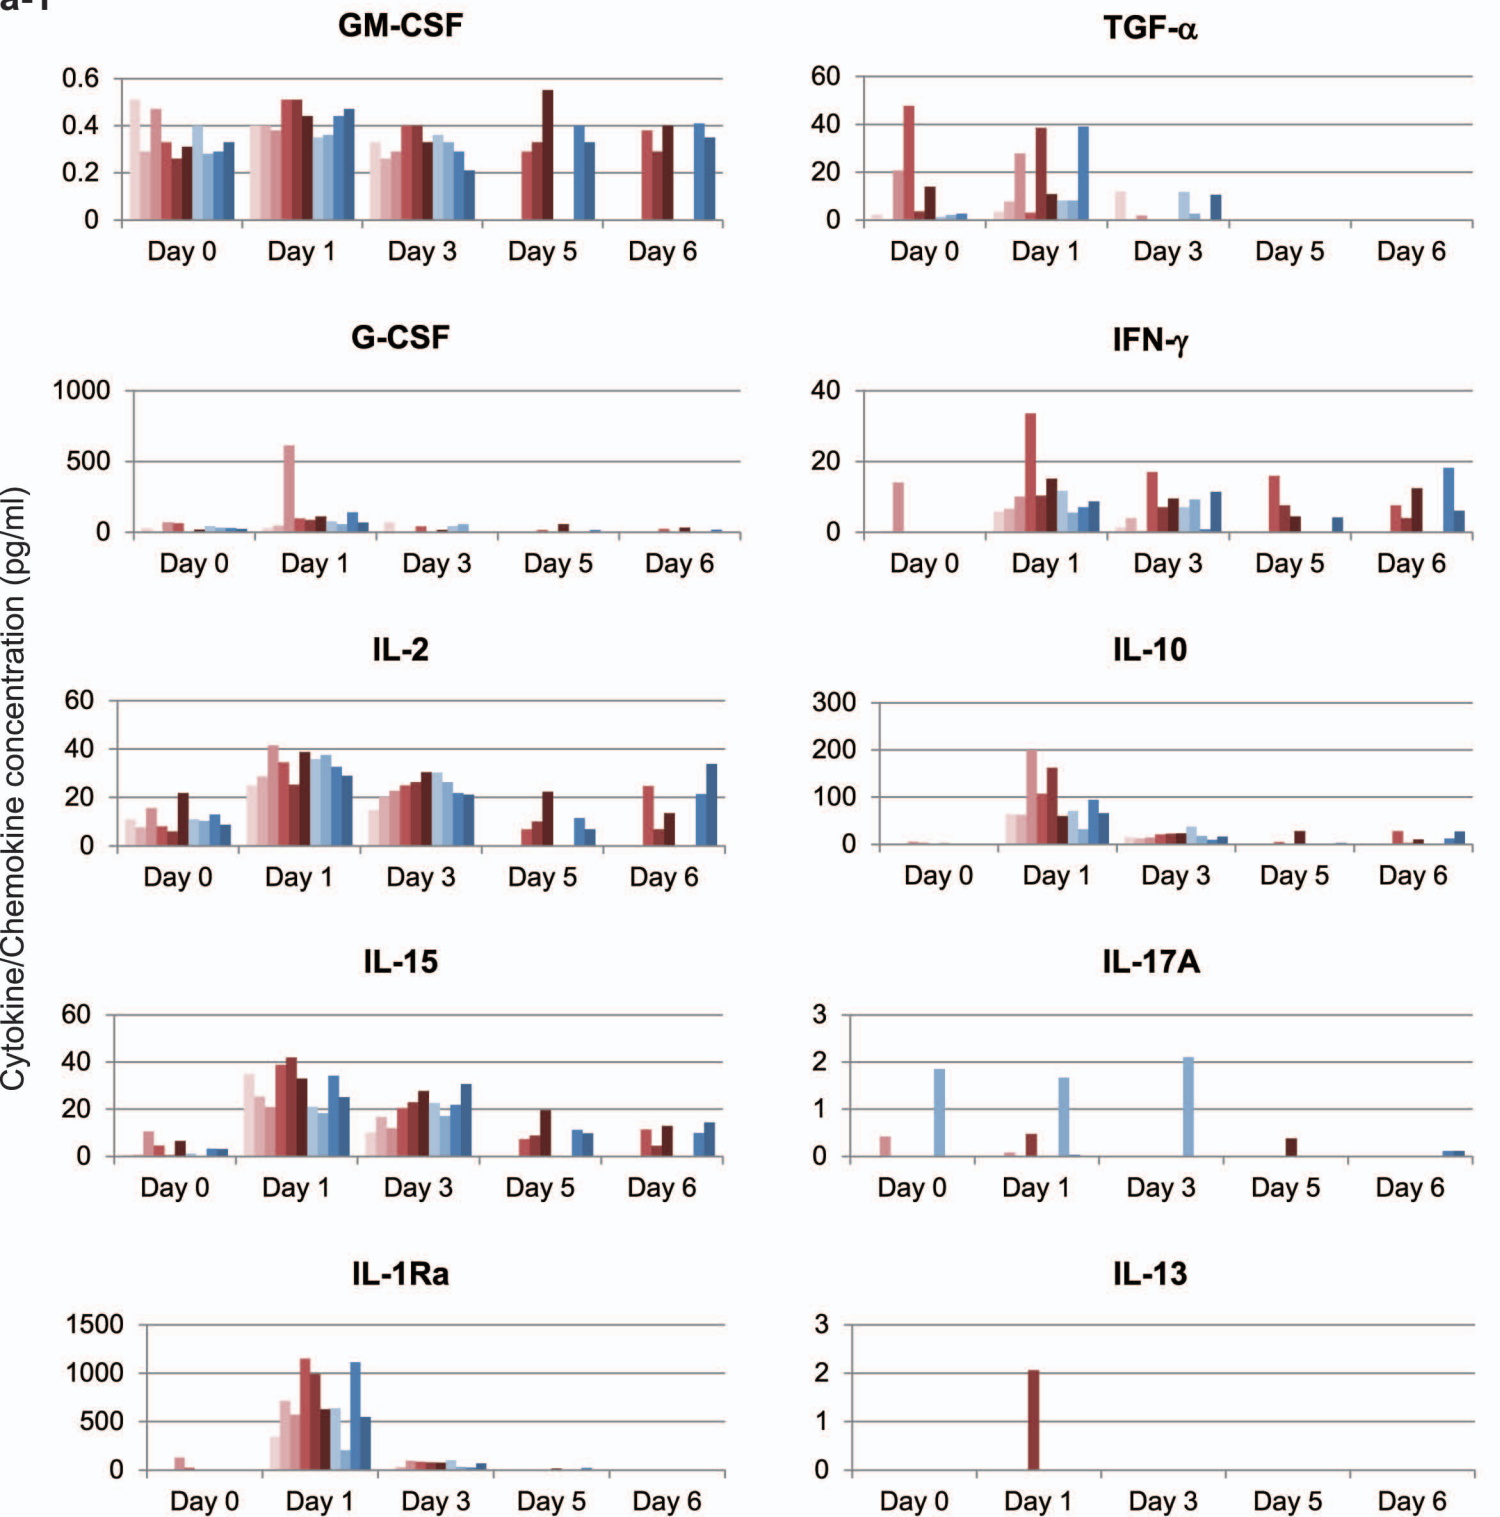

- Macaque #1
- Macaque #2
- Macaque #3
- Macaque #4
- Macaque #5
- Macaque #6
- Macaque #7
- Macaque #8
- Macaque #9
- Macaque #10

Infected with Anhui/1

Infected with Dk/GM466

**Supplementary Figure S9. Pro-inflammatory cytokine/chemokine responses in the lungs of infected cynomolgus macaques.** The concentrations of various cytokines/chemokines in the serum of infected cynomolgus macaques at 0, 1, 3, 5, and 6 dpi (a) and their lungs (left and right lobes independently) at 3 (b) and 6 (c) dpi were measured by means of protein array analysis with the MILLIPLEX MAP Non-human Primate Cytokine/Chemokine Panel–Premixed 23-Plex (Merck Millipore).

**IL-1β**

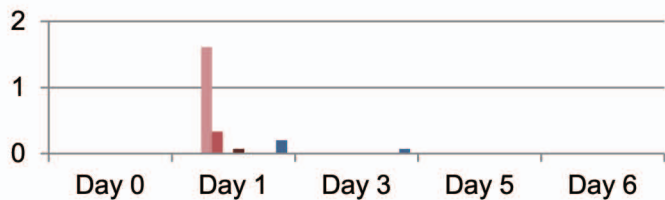

**IL-5**

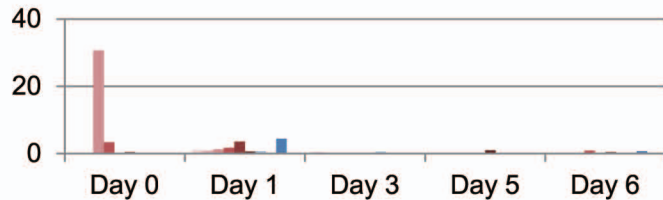

**IL-6**

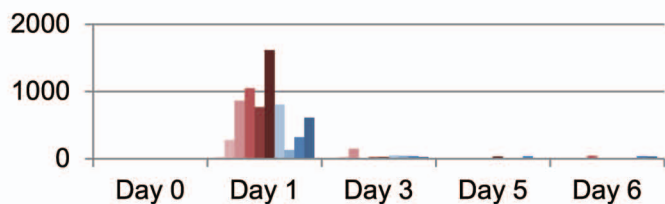

**IL-8**

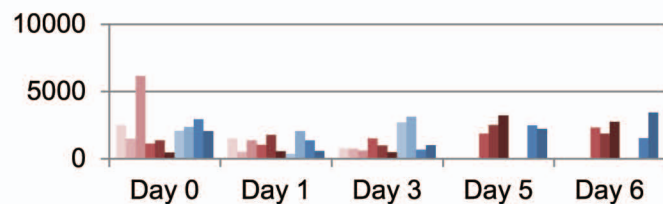

**MIP-1α**

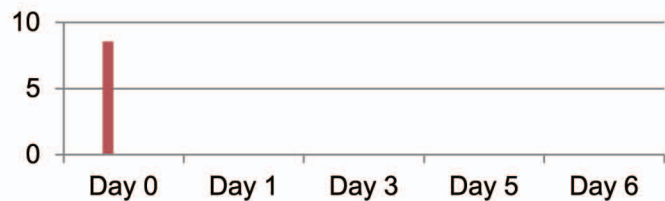

**MCP-1**

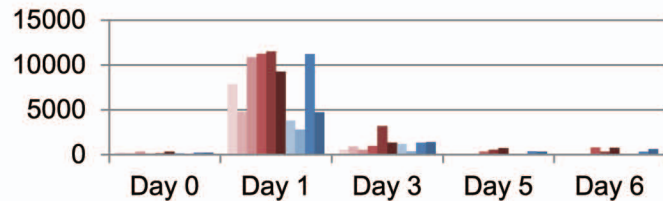

**MIP-1β**

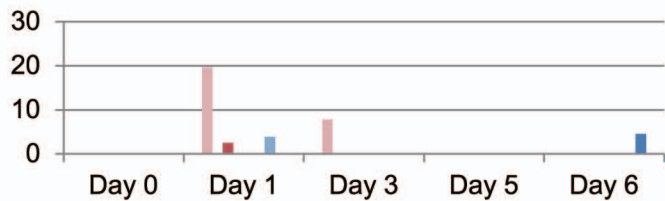

**IL-12/23(P40)**

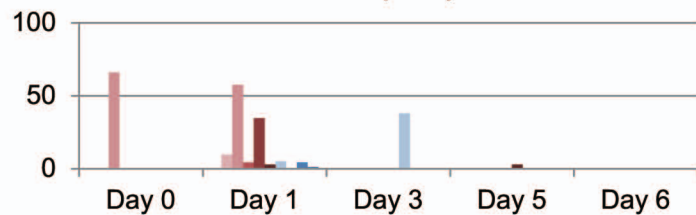

**VEGF**

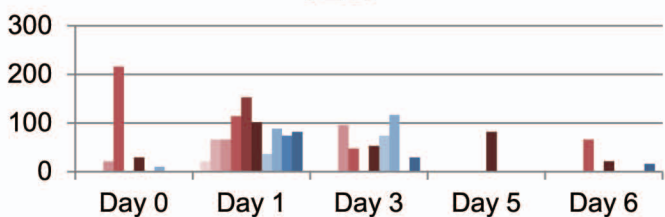

**IL-18**

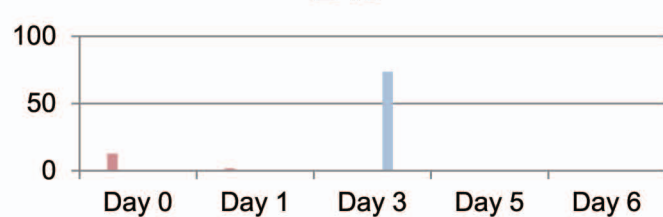

- Macaque #1
- Macaque #2
- Macaque #3
- Macaque #4
- Macaque #5
- Macaque #6
- Macaque #7
- Macaque #8
- Macaque #9
- Macaque #10

Infected with Anhui/1

Infected with Dk/GM466

**b**

Cytokine/Chemokine concentration (pg/ml)

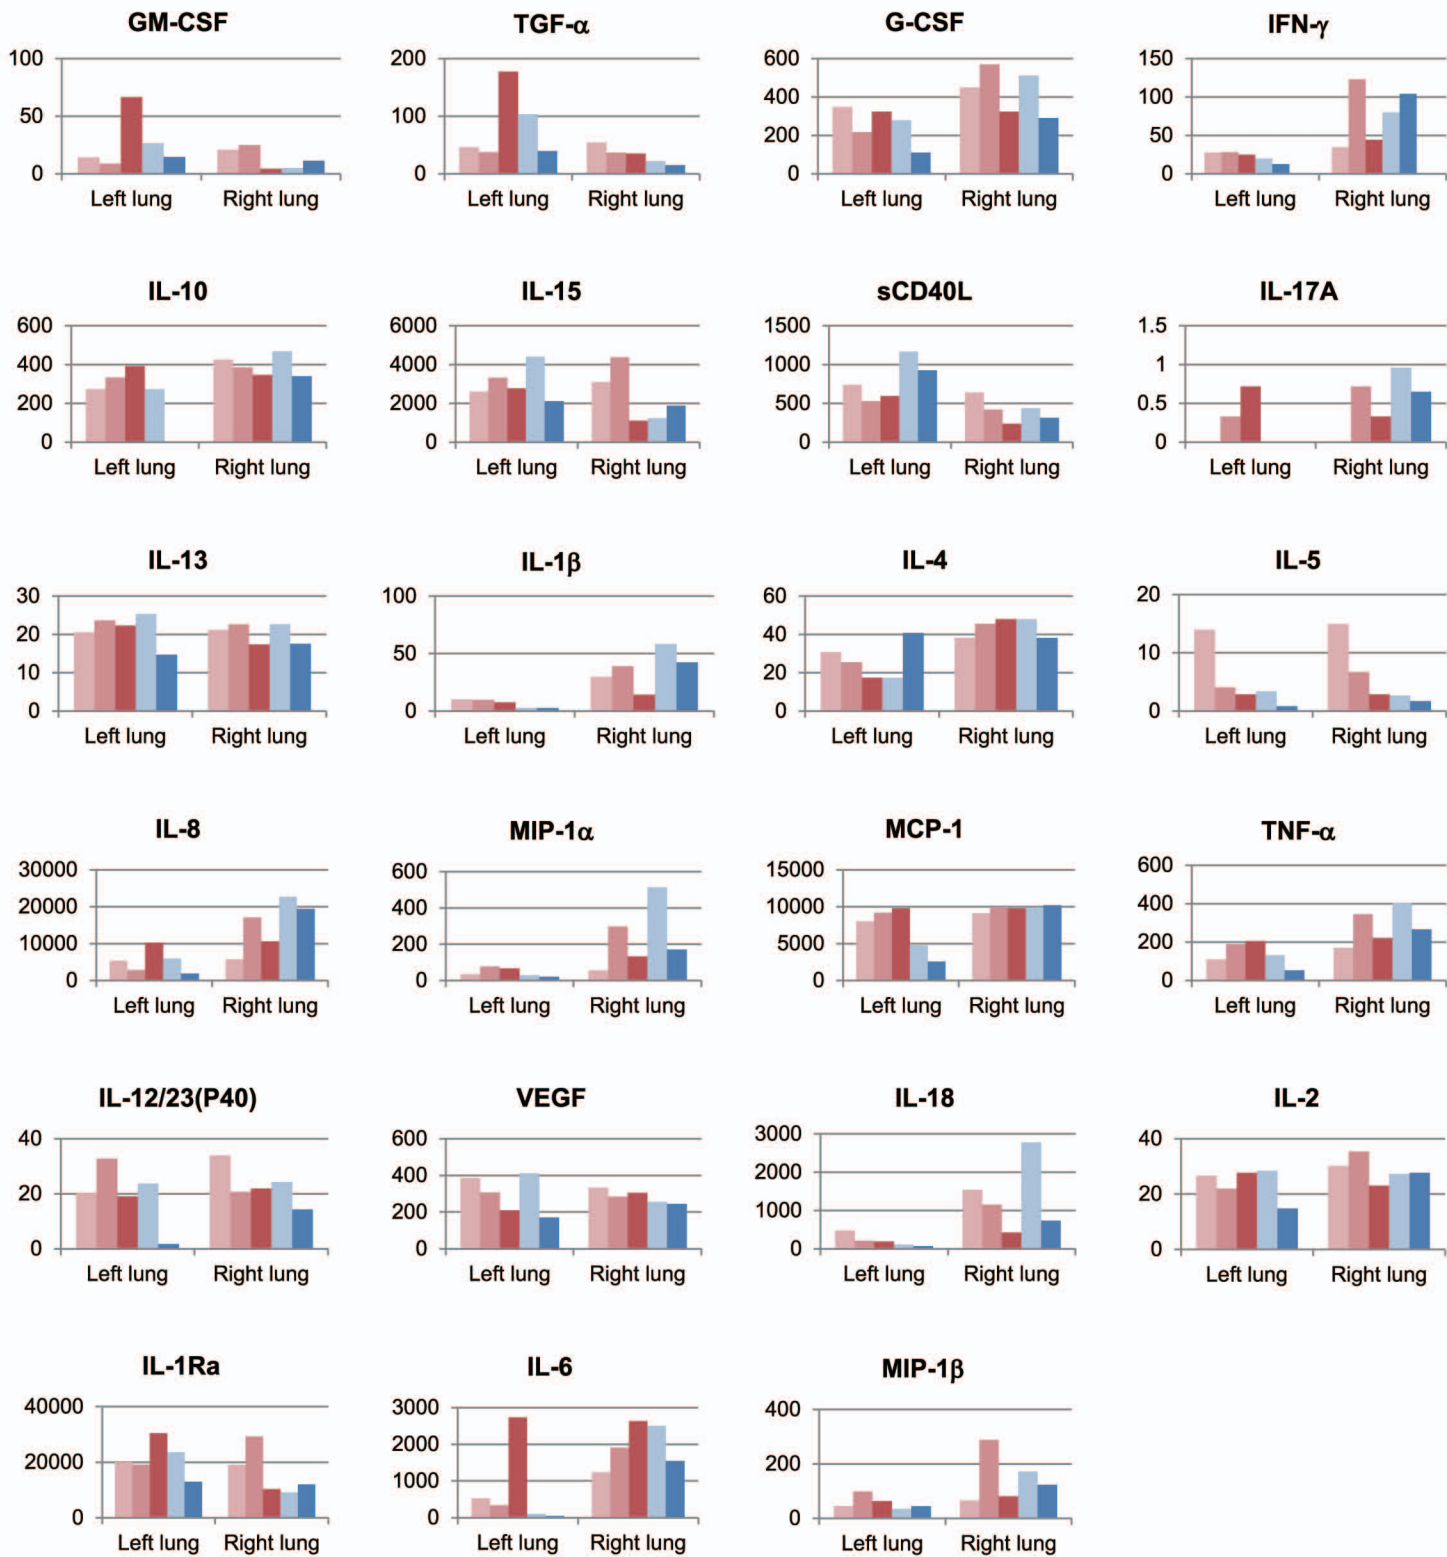

■ Macaque #1  
■ Macaque #2  
■ Macaque #3  
■ Macaque #7  
■ Macaque #8

Infected with Anhui/1

Infected with Dk/GM466

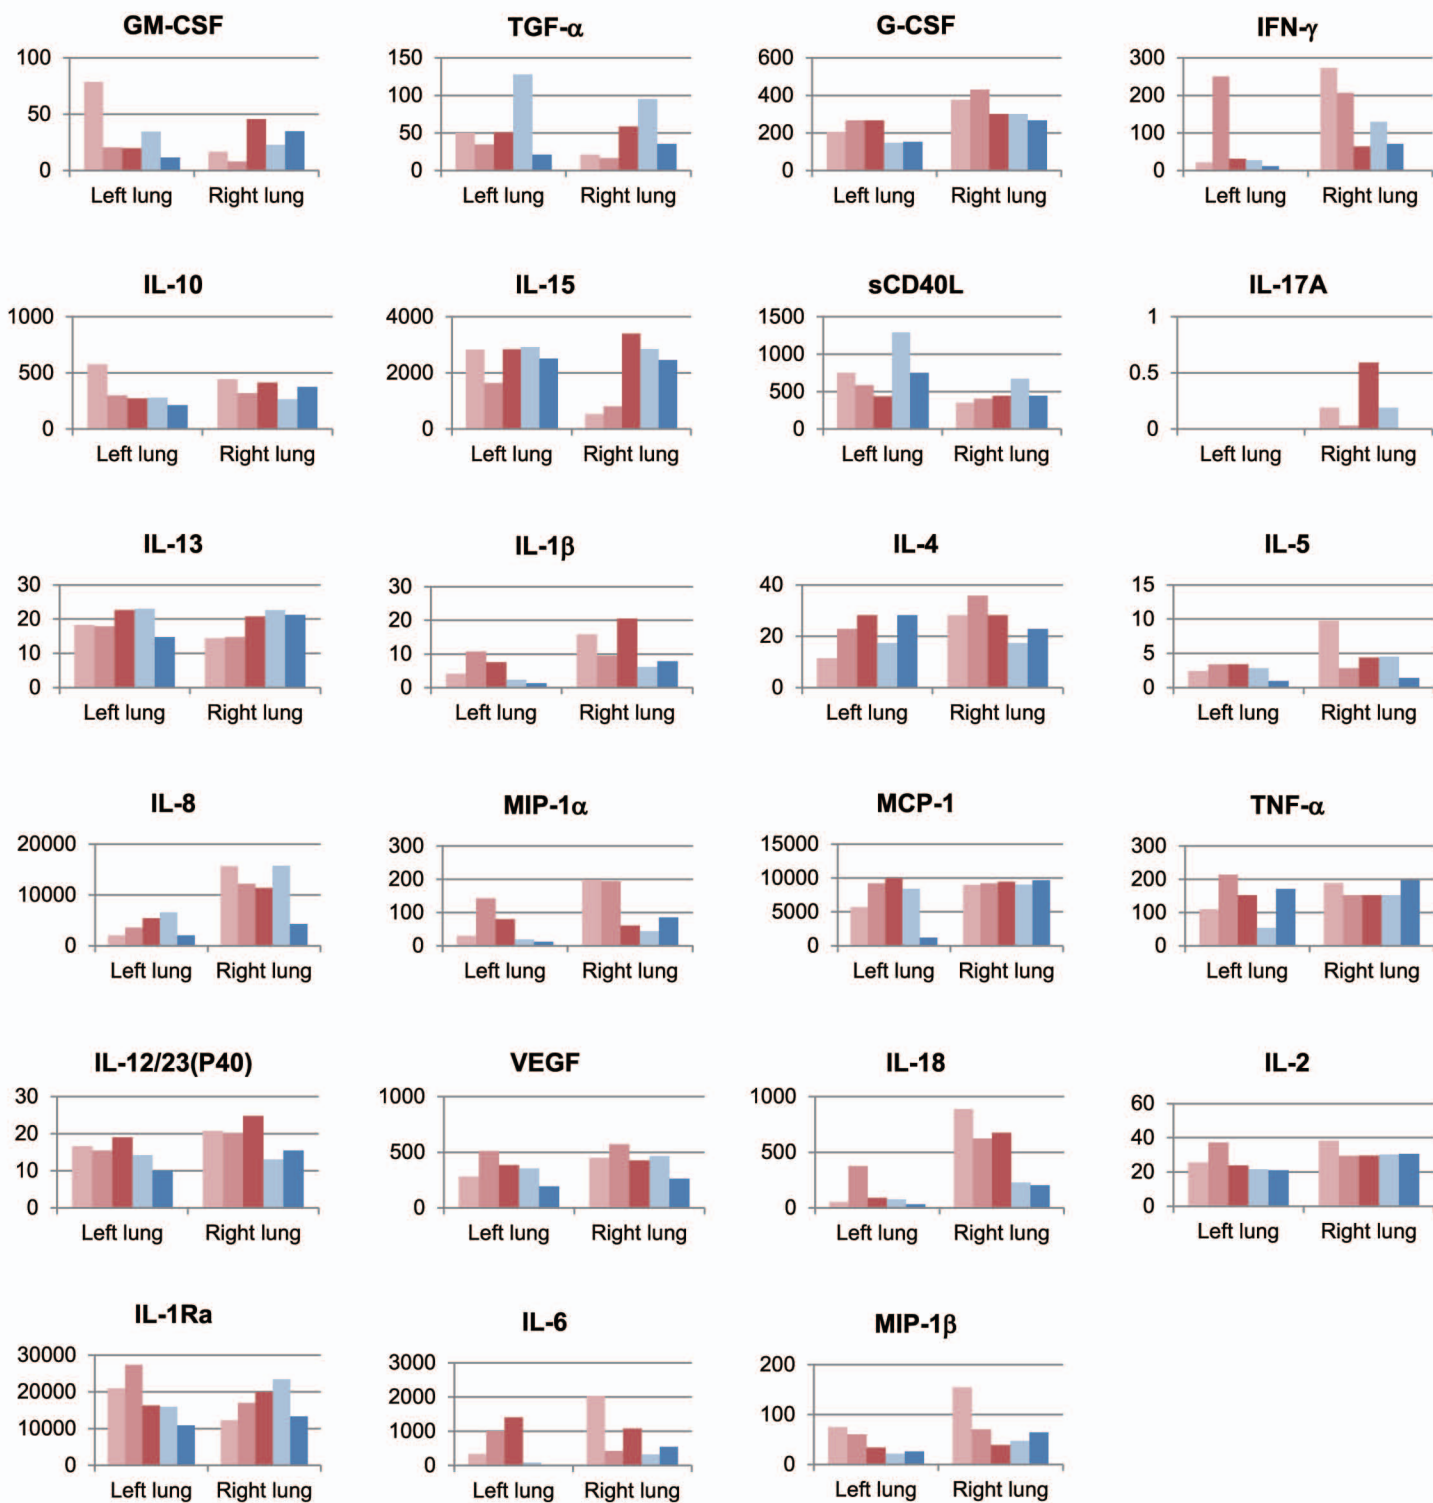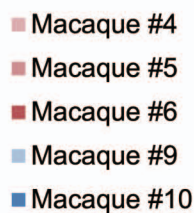

Infected with Anhui/1

Infected with Dk/GM466



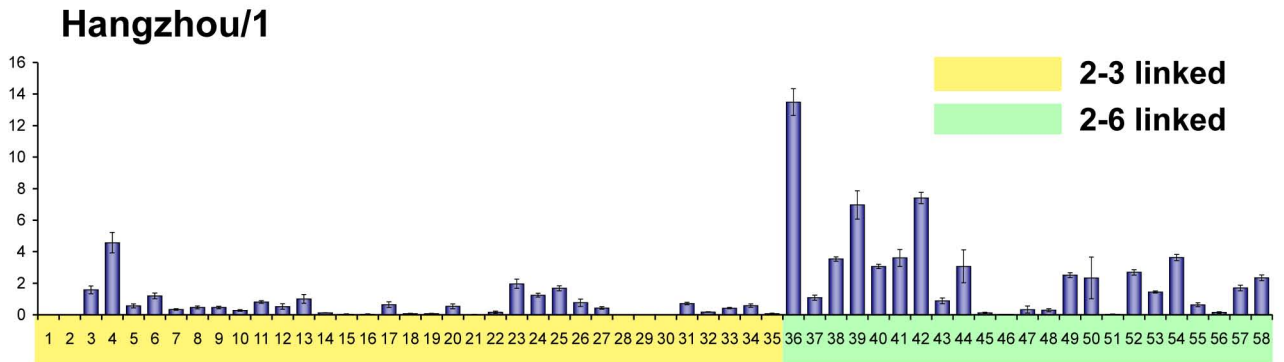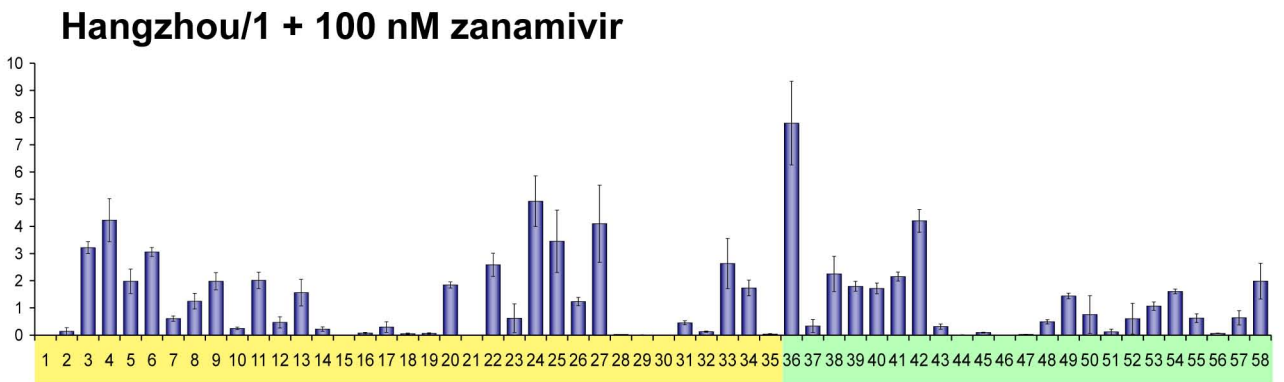

**Supplementary Figure S10. Effect of neuraminidase activity on glycan array specificity of recombinant Hangzhou/1 virus.** Glycan array analysis of a recombinant Hangzhou/1 virus (possessing the Hangzhou/1 HA and Anhui/1 NA genes with the remaining genes from PR8) was performed at 256 HAU/ml as described in Figure 3 in the absence (top) or presence (bottom) of 100 nM zanamivir during the adsorption step. Glycans on the array are shown in Table S9, except that glycan 1 is missing (value of 0).

Anhui/1

Dk/GM466

Trachea

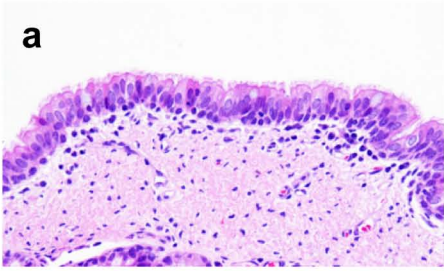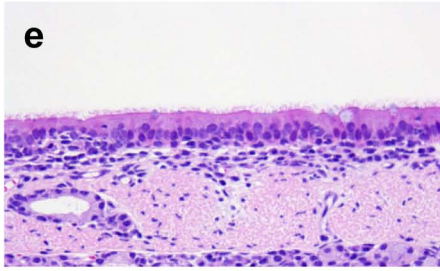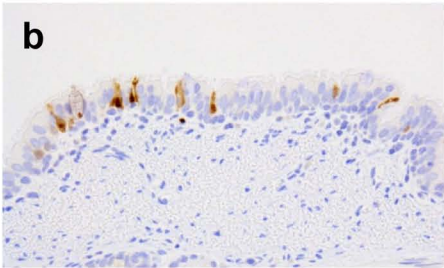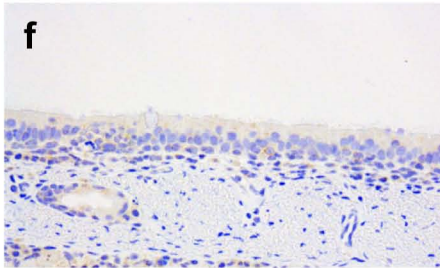

Lungs

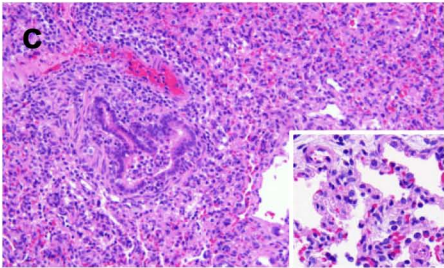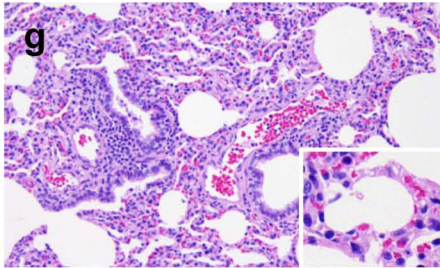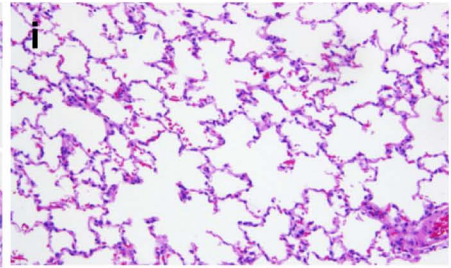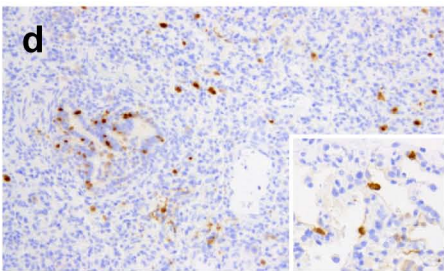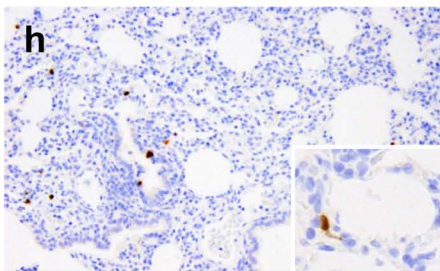

**Supplementary Figure S11. Pathological findings in infected pigs.** Shown are representative pathological findings in the trachea (**a, b, e, f**) and lungs (**c, d, g, h**) of miniature pigs infected with Anhui/1 (**a–d**) or Dk/GM466 (**e–h**) at 3 dpi with HE staining (**a, c, e, g**) or immunohistochemistry for influenza viral antigen (**b, f, d, h**).

## Supplementary Tables

**Supplementary Table S1. Virus titres in organs of infected mice<sup>a</sup>.**

| Inoculum titre      | Virus      |       | Virus titres (mean log <sub>10</sub> PFU ± SD/g) in: |            |
|---------------------|------------|-------|------------------------------------------------------|------------|
|                     |            |       | Nasal turbinates                                     | Lungs      |
| 10 <sup>4</sup> PFU | Anhui/1    | Day 3 | 6.23±0.55                                            | 7.92±0.02* |
|                     |            | Day 6 | 5.67±0.46                                            | 6.26±0.34  |
|                     | Dk/GM466   | Day 3 | 5.82±1.36                                            | 5.90±0.40  |
|                     |            | Day 6 | 4.58±0.21                                            | 5.97±0.09  |
|                     | CA04       | Day 3 | 6.42±0.14                                            | 7.55±0.40* |
|                     |            | Day 6 | 5.05±0.25                                            | 6.32±0.16  |
| 10 <sup>6</sup> PFU | Anhui/1    | Day 3 | 6.70±0.09                                            | 7.20±0.18* |
|                     |            | Day 6 | 6.10±0.46                                            | 6.87±0.13* |
|                     | Dk/GM466   | Day 3 | 6.35±0.31                                            | 6.25±0.23  |
|                     |            | Day 6 | 5.07±0.77                                            | 5.31±0.09  |
|                     | CA04       | Day 3 | 7.40±0.27*                                           | 7.36±0.14* |
|                     |            | Day 6 | 6.70±0.29                                            | 6.20±0.23* |
|                     | Shanghai/1 | Day 3 | 6.64±0.27                                            | 7.27±0.24* |
|                     |            | Day 6 | 6.50±0.59                                            | 6.18±0.40  |

<sup>a</sup>BALB/c mice were intranasally infected with 10<sup>4</sup> or 10<sup>6</sup> PFU (50 µl each) of virus. Three animals from each group were euthanized at 3 and 6 days post-infection for virus titration. The statistical significance of differences in virus titres of Dk/GM466-infected mice and the others were assessed by use of the Welch's *t*-test with Bonferroni's correction (asterisk, *p*<0.05).

**Supplementary Table S2. Virus titres in organs of infected ferrets<sup>a</sup>.**

|                 | Virus titres (mean log <sub>10</sub> PFU ± SD/g) of animals infected with: |          |            |         |          |         |         |                |
|-----------------|----------------------------------------------------------------------------|----------|------------|---------|----------|---------|---------|----------------|
|                 | Anhui/1                                                                    |          | Shanghai/1 |         | Dk/GM466 |         | CA04    |                |
|                 | Day 3                                                                      | Day 6    | Day 3      | Day 6   | Day 3    | Day 6   | Day 3   | Day 6          |
| Nasal turbinate | 7.1±0.3                                                                    | 5.4±1.6  | 6.9±0.2    | 5.0±0.6 | 7.2±0.2  | 6.2±0.4 | 7.9±0.4 | - <sup>b</sup> |
| Trachea         | 6.9±0.7                                                                    | 4.4±0.6  | 6.9±0.5    | 4.9±0.6 | 5.5±0.6  | 5.0     | 6.7±0.1 | -              |
| Lung            | 3.0, 3.5                                                                   | -        | 2.2        | 5.5     | 3.1, 2.3 | -       | -       | 3.4            |
| Spleen          | -                                                                          | -        | -          | -       | -        | -       | -       | -              |
| Kidney          | -                                                                          | -        | -          | -       | -        | -       | -       | -              |
| Brain           | 3                                                                          | -        | 2.1        | -       | -        | -       | -       | -              |
| Intestines      | -                                                                          | 2.3      | -          | -       | -        | -       | -       | -              |
| Liver           | -                                                                          | 2.5      | -          | -       | -        | -       | 2.0     | -              |
| Feces           | -                                                                          | 5.3, 2.7 | -          | 3.5     | 3.1      | -       | 3.6     | -              |

<sup>a</sup>Ferrets were intranasally infected with 10<sup>6</sup> PFU (0.5 ml) of virus. Three ferrets from each group were euthanized at 3 and 6 dpi for virus titration. Replication of virus in spleen and kidneys was also examined; no virus was detected in these organs. Individual titers were recorded when virus was not recovered from all three ferrets.

<sup>b</sup>-, virus not detected (detection limit: 1.3 log<sub>10</sub> PFU/g).



**Supplementary Table S3. Virus titres in respiratory swabs from infected cynomolgus macaques<sup>a</sup>.**

|               |       | Virus titres (log <sub>10</sub> PFU/g) of animals infected with: |      |                |      |      |          |      |      |      |      |
|---------------|-------|------------------------------------------------------------------|------|----------------|------|------|----------|------|------|------|------|
|               |       | Anhui/1                                                          |      |                |      |      | Dk/GM466 |      |      |      |      |
| animal ID     |       | #1                                                               | #2   | #3             | #4   | #5   | #6       | #7   | #8   | #9   | #10  |
| Nasal swab    | Day 1 | 6.48                                                             | 4.71 | 4.00           | 4.36 | 6.08 | 5.26     | 4.57 | 1.95 | 4.18 | 3.51 |
|               | Day 3 | 3.58                                                             | 5.34 | 2.26           | 3.15 | 2.78 | 2.58     | 2.40 | 3.59 | 2.85 | 1.95 |
|               | Day 5 | /                                                                | /    | /              | 4.70 | 3.20 | 4.15     | /    | /    | 5.18 | 3.73 |
|               | Day 6 | /                                                                | /    | /              | -    | 3.5  | -        | /    | /    | 5.26 | 4.53 |
| Tracheal swab | Day 1 | 3.60                                                             | 3.26 | 4.28           | 4.45 | 5.56 | 5.48     | 4.36 | 2.90 | 2.76 | 3.30 |
|               | Day 3 | 2.04                                                             | 2.61 | - <sup>b</sup> | 1.48 | 1.85 | 2.00     | -    | 2.00 | 1.48 | -    |
|               | Day 5 | /                                                                | /    | /              | 3.36 | 1.48 | 3.11     | /    | /    | 2.57 | 3.73 |
|               | Day 6 | /                                                                | /    | /              | 3.04 | 5.00 | 6.51     | /    | /    | -    | 3.30 |

<sup>a</sup>Cynomolgus macaques were inoculated with  $6.7 \times 10^7$  PFU of virus (6.7 ml) through multiple routes. Nasal and tracheal swabs were collected every other day for virus titration.

<sup>b</sup>-, virus not detected (detection limit: 1.3 log<sub>10</sub> PFU/ml).

Diagonal lines: not applicable, animals were euthanized at 3 days post-infection.

**Supplementary Table S4. Virus titres in organs of infected cynomolgus macaques<sup>a</sup>.**

| Animal ID           | Virus titres (log <sub>10</sub> PFU/g) of animals infected with: |     |     |       |                |     |          |     |       |     |
|---------------------|------------------------------------------------------------------|-----|-----|-------|----------------|-----|----------|-----|-------|-----|
|                     | Anhui/1                                                          |     |     |       |                |     | Dk/GM466 |     |       |     |
|                     | Day 3                                                            |     |     | Day 6 |                |     | Day 3    |     | Day 6 |     |
|                     | #1                                                               | #2  | #3  | #4    | #5             | #6  | #7       | #8  | #9    | #10 |
| Nasal turbinates    | 5.5                                                              | 6.8 | 6.9 | 3.1   | 4.8            | 5.9 | 4.6      | 6.2 | 6.7   | 5.6 |
| Tonsils             | 2.1                                                              | 4.1 | 2.2 | 4.3   | 5.8            | 5.4 | 3.1      | 3.5 | 6.5   | 5.6 |
| Trachea             | 4.9                                                              | 4.2 | 3.7 | 4.7   | - <sup>b</sup> | 5.6 | 3.5      | 4.5 | 6.6   | 4.9 |
| Bronchus (right)    | 4.6                                                              | 3.3 | 3.8 | -     | 2.9            | 7.5 | 3.8      | 4.3 | 4.1   | 6.6 |
| Bronchus (left)     | -                                                                | 4.4 | 4.3 | 3.3   | -              | 7.4 | 5.4      | 3.6 | 2.9   | 3.5 |
| Lung (upper right)  | -                                                                | 4.4 | 3.9 | 2.7   | 3.7            | 4.2 | 4.3      | 3.5 | 4.9   | -   |
| Lung (middle right) | 3.3                                                              | 4.5 | 5.2 | 3     | 3.4            | 5.1 | -        | 3.9 | 4.1   | -   |
| Lung (lower right)  | -                                                                | 5.5 | 5.4 | 2.1   | 2.7            | 5.1 | 5.1      | 5.2 | 6.4   | -   |
| Lung (upper left)   | 3.3                                                              | 2.5 | 4.8 | -     | 3.8            | 4.8 | -        | 4.0 | 5.7   | -   |
| Lung (middle left)  | -                                                                | 4   | 3.4 | -     | 3.8            | 3.9 | 4.1      | 3.4 | 2.5   | -   |
| Lung (lower left)   | 3.9                                                              | 5.4 | 5.6 | -     | 3.3            | 4.8 | 3.9      | 4.8 | 3.7   | -   |
| Brain (frontal)     | -                                                                | 2.4 | -   | -     | -              | 2.5 | -        | -   | -     | 1.9 |
| Brain (parietal)    | -                                                                | 2.4 | -   | -     | -              | -   | -        | -   | -     | -   |
| Brain (temporal)    | -                                                                | 2.6 | -   | -     | -              | -   | -        | -   | -     | -   |
| Brain (occipital)   | -                                                                | -   | -   | -     | -              | 2.4 | -        | -   | -     | 1.9 |
| Brain (cerebellum)  | -                                                                | -   | -   | -     | -              | 2.0 | -        | -   | -     | 1.9 |
| Brain (brain stem)  | -                                                                | 2.3 | -   | -     | -              | 2.6 | -        | -   | -     | -   |
| Olfactory bulb      | -                                                                | 2.9 | -   | -     | -              | 3.6 | -        | -   | -     | 2.5 |
| Mediastinal LNs     | 2.5                                                              | -   | 3.3 | -     | -              | -   | 2.6      | -   | 3.3   | 2.4 |
| Heart               | 2.4                                                              | -   | -   | -     | -              | 3.6 | -        | -   | -     | 2.0 |
| Kidney              | -                                                                | -   | -   | -     | -              | 4.3 | -        | -   | -     | -   |
| Duodenum            | -                                                                | -   | -   | -     | -              | 2.6 | 4.3      | -   | -     | -   |
| Rectum              | -                                                                | -   | -   | -     | -              | 3.4 | -        | -   | -     | -   |

<sup>a</sup>Cynomolgus macaques were inoculated with  $6.7 \times 10^7$  PFU of virus (6.7 ml) through multiple routes. Three and two macaques per group were euthanized on days 3 and 6 post-infection for virus titration. No virus was recovered from the spleen or liver of any animals.

<sup>b</sup>-, virus not detected (detection limit:  $1.3 \log_{10}$  PFU/g). LN, lymph node.

**Supplementary Table S5. Ferret HI titres.**

| Virus     | Animal ID | Virus titres (log <sub>10</sub> PFU/ml) in nasal washes |       |       |       |       |                | Seroconversion (HI titre) <sup>c</sup> |   |      |
|-----------|-----------|---------------------------------------------------------|-------|-------|-------|-------|----------------|----------------------------------------|---|------|
|           |           | Day 1                                                   | Day 3 | Day 5 | Day 7 | Day 9 | Day 11         |                                        |   |      |
| Anhui/1   | Pair 1    | <i>i</i>                                                | #1    | 7.09  | 5.82  | 5.10  | - <sup>b</sup> | -                                      | - | 320  |
|           |           | <i>c</i>                                                | #2    | -     | -     | -     | -              | -                                      | - | <10  |
|           | Pair 2    | <i>i</i>                                                | #3    | 7.05  | 5.62  | 5.72  | 3.00           | -                                      | - | 320  |
|           |           | <i>c</i>                                                | #4    | -     | -     | -     | -              | -                                      | - | <10  |
|           | Pair 3    | <i>i</i>                                                | #5    | 7.51  | 5.62  | 4.83  | -              | -                                      | - | 320  |
|           |           | <i>c</i>                                                | #6    | -     | 3.89  | 6.11  | 4.78           | -                                      | - | 640  |
| Dk/GM 466 | Pair 4    | <i>i</i>                                                | #7    | 4.04  | 5.26  | 5.18  | -              | -                                      | - | 80   |
|           |           | <i>c</i>                                                | #8    | -     | -     | -     | -              | -                                      | - | <10  |
|           | Pair 5    | <i>i</i>                                                | #9    | 5.64  | 5.26  | 4.72  | -              | -                                      | - | 160  |
|           |           | <i>c</i>                                                | #10   | -     | -     | -     | -              | -                                      | - | <10  |
|           | Pair 6    | <i>i</i>                                                | #11   | 4.68  | 5.15  | 5.09  | 2.91           | -                                      | - | 320  |
|           |           | <i>c</i>                                                | #12   | -     | -     | -     | -              | -                                      | - | <10  |
| CA04      | Pair 7    | <i>i</i>                                                | #13   | 6.78  | 4.64  | 4.58  | -              | -                                      | - | 1280 |
|           |           | <i>c</i>                                                | #14   | -     | 5.85  | 4.51  | -              | -                                      | - | 640  |
|           | Pair 8    | <i>i</i>                                                | #15   | 6.79  | 5.19  | 5.38  | -              | -                                      | - | 1280 |
|           |           | <i>c</i>                                                | #16   | -     | 4.91  | 4.94  | -              | -                                      | - | 1280 |
|           | Pair 9    | <i>i</i>                                                | #17   | 7.36  | 5.05  | 5.41  | -              | -                                      | - | 160  |
|           |           | <i>c</i>                                                | #18   | -     | 7.13  | 3.96  | 3.60           | -                                      | - | 640  |

<sup>a</sup>For each pair of ferrets, one animal was intranasally inoculated with  $5 \times 10^6$  PFU of virus (0.5 ml) (inoculated ferret, *i*) and one day later, a naïve ferret was placed in an adjacent cage (contact ferret, *c*). Nasal washes were collected from inoculated and contact ferrets every other day for virus titration.

<sup>b</sup>-, virus not detected (detection limit:  $1.3 \log_{10}$  PFU/ml).

<sup>c</sup>Haemagglutination Inhibition (HI) assays were carried out with homologous virus and turkey red blood cells.

**Supplementary Table S6. Differences in amino acid sequence between the reference virus and virus recovered from contact ferret.**

| Segment         | Amino acid sequence and position (nucleotide sequence and position) |                                   |                                                  |                                                 |                 |                 |
|-----------------|---------------------------------------------------------------------|-----------------------------------|--------------------------------------------------|-------------------------------------------------|-----------------|-----------------|
|                 | Reference <sup>a</sup>                                              | Stock virus <sup>b</sup>          | Virus isolated from infected ferret <sup>c</sup> | Virus isolated from contact ferret <sup>d</sup> |                 |                 |
|                 |                                                                     |                                   |                                                  | Day 3                                           | Day 5           | Day 7           |
| PB2             | 72E (243G)                                                          | 72E (243G)                        | 72E (243G)                                       | 72E (243A)                                      | 72E (243A)      | 72E (243A)      |
|                 | 426Q (1305G)                                                        | 426Q (1305G)                      | 426Q (1305G)                                     | 426Q (1305A)                                    | 426Q (1305A)    | 426Q (1305A)    |
|                 | 659N (2004C)                                                        | 659N (2004C)                      | 659N (2004C)                                     | 659N (2004T)                                    | 659N (2004T)    | 659N (2004T)    |
| PB1             | 629N (1901C)                                                        | 629N (1901C)                      | 629N (1901C)                                     | 629N (1901T)                                    | 629N (1901T)    | 629N (1901T)    |
| PA              | 110Y (354T)                                                         | 110Y (354T)                       | 110Y (354T)                                      | 110Y (354C)                                     | 110Y (354C)     | 110Y (354C)     |
| HA <sup>e</sup> | 71T (257C)                                                          | 71T (257C)                        | 71T (257C)                                       | 71T/I (257C/T <sup>f</sup> )                    | 71I (257T)      | 71I (257T)      |
|                 | 131R (437G)                                                         | 131R (437G)                       | 131R (437G)                                      | 131R/K (437G/A <sup>f</sup> )                   | 131K (437A)     | 131K (437A)     |
|                 | 132N (442A)                                                         | 132N/D (442A/G)                   | 132N/D (442A/G)                                  | 132N (442A)                                     | 132N (442A)     | 132N (442A)     |
|                 | 135A (448G)                                                         | 135A/T (448G/A <sup>f</sup> )     | 135A/T (448G/A <sup>f</sup> )                    | 135A/T (448G/A <sup>f</sup> )                   | 135T (448A)     | 135T (448A)     |
|                 | 159-160N <sup>g</sup> (520A)                                        | 159-160N/D (520A/G <sup>f</sup> ) | 159-160N/D (520A/G <sup>f</sup> )                | 159-160N (520A)                                 | 159-160N (520A) | 159-160N (520A) |
|                 | 10T (47C)                                                           | 10T/I (47C/T)                     | 10T/I (47C/T)                                    | 10T (47C)                                       | 10T (47C)       | 10T (47C)       |
| NA              | 27A (97G)                                                           | 27A (97G)                         | 27A (97G)                                        | 27A/T (97G/A <sup>f</sup> )                     | 27T (97A)       | 27T (97A)       |
|                 | 228Q (687G)                                                         | 228Q (687G)                       | 228Q (687G)                                      | 228Q (687G/A <sup>f</sup> )                     | 228Q (687A)     | 228Q (687A)     |
|                 | 412D (1239C)                                                        | 412D (1239C)                      | 412D (1239C)                                     | 412D (1239C/T <sup>f</sup> )                    | 412D (1239T)    | 412D (1239T)    |

<sup>a</sup>The Anhui/1 reference sequence was obtained from the GISAID database (GISAID accession number EPI439507).

<sup>b</sup>The stock of egg-grown Anhui/1 virus was sequenced.

<sup>c</sup>We sequenced virus isolated from the infected ferret from which virus transmitted to the contact ferret.

<sup>d</sup>Viruses isolated from contact ferrets in the transmission experiment were sequenced.

<sup>e</sup>Amino acid positions of HA are based on H3 HA numbering.

<sup>f</sup>Indicates a mixed population.

<sup>g</sup>H7 HA possesses an amino acid insertion relative to H3 HA, which was used as a reference for numbering.



**Supplementary Table S7. Amino acid sequences of HA clones of the egg-grown virus stock of Anhui/1 and viruses recovered from the contact ferrets<sup>a</sup>.**

|                                                      | Amino acid position<br>(H3 numbering) |     |     |     |                      | Number of HA clones |                     |
|------------------------------------------------------|---------------------------------------|-----|-----|-----|----------------------|---------------------|---------------------|
|                                                      | 71                                    | 131 | 132 | 135 | 159/160 <sup>b</sup> |                     |                     |
| Reference <sup>c</sup>                               | T                                     | R   | N   | A   | N                    |                     |                     |
| Stock virus <sup>d</sup>                             |                                       |     |     |     |                      |                     |                     |
| Combination 1                                        | T                                     | R   | D   | A   | D                    | 18/39               |                     |
| Combination 2                                        | T                                     | R   | N   | A   | D                    | 6/39                |                     |
| Combination 3                                        | T                                     | R   | N   | T   | N                    | 8/39                |                     |
| Combination 4                                        | T                                     | R   | N   | A   | N                    | 5/39                |                     |
| Combination 5                                        | I                                     | K   | N   | T   | N                    | 2/39                |                     |
| Virus recovered from the contact ferret <sup>e</sup> |                                       |     |     |     |                      | 3 days post-contact | 5 days post-contact |
| Combination 1                                        | I                                     | K   | N   | T   | N                    | 19/44               | 17/17               |
| Combination 2                                        | T                                     | R   | N   | A   | N                    | 17/44               | 0/17                |
| Combination 3                                        | I                                     | R   | N   | A   | N                    | 4/44                | 0/17                |
| Combination 4                                        | T                                     | K   | N   | T   | N                    | 3/44                | 0/17                |
| Combination 5                                        | I                                     | K   | N   | A   | N                    | 1/44                | 0/17                |

<sup>a</sup>Amino acid positions are based on H3 HA numbering.

<sup>b</sup> H7 HA possesses an amino acid insertion relative to H3 HA, which was used as a reference for numbering.

<sup>c</sup>The Anhui/1 reference sequence was obtained from the GISAID database (GISAID accession number EPI439507).

<sup>d</sup>The stock of egg-grown Anhui/1 virus was sequenced.

<sup>e</sup>Sequences of viruses recovered from the contact ferret in the transmission experiment.

**Supplementary Table S8. Comparison of the amino acid sequences of Anhui/1, Shanghai/1, and Hangzhou/1 HAs.**

| Amino acid position <sup>a</sup> | Anhui/1 | Shanghai/1 | Hangzhou/1 |
|----------------------------------|---------|------------|------------|
| 138                              | A       | S          | A          |
| 174                              | S       | N          | S          |
| 186                              | V       | G          | V          |
| 221                              | P       | T          | P          |
| 226                              | L       | Q          | I          |
| 276                              | D       | N          | N          |
| 283                              | H       | Y          | H          |
| 400                              | N       | T          | N          |
| 531                              | V       | A          | V          |

<sup>a</sup>Positions at which the amino acid sequences of Anhui/1, Shanghai/1, and Hangzhou/1 HA differ.

**Supplementary Table S9. List of glycans used for arrays.**

| Glycan # | Name                                                                                                                                                                                                                                                                                                                                                               |
|----------|--------------------------------------------------------------------------------------------------------------------------------------------------------------------------------------------------------------------------------------------------------------------------------------------------------------------------------------------------------------------|
| 1        | Gal $\beta$ (1-4)GlcNAc $\beta$ -ethyl-NH <sub>2</sub>                                                                                                                                                                                                                                                                                                             |
| 2        | Gal $\beta$ (1-4)GlcNAc $\beta$ (1-2)Man $\alpha$ (1-3)[Gal $\beta$ (1-4)GlcNAc $\beta$ (1-2)Man $\alpha$ (1-6)]Man $\beta$ (1-4)GlcNAc $\beta$ (1-4)GlcNAc $\beta$ -Asn-NH <sub>2</sub>                                                                                                                                                                           |
| 3        | NeuAca(2-3)Gal $\beta$ (1-4)6-O-sulfo-GlcNAc $\beta$ -propyl-NH <sub>2</sub>                                                                                                                                                                                                                                                                                       |
| 4        | NeuAca(2-3)Gal $\beta$ (1-4)[Fuca(1-3)]6-O-sulfo-GlcNAc $\beta$ -propyl-NH <sub>2</sub>                                                                                                                                                                                                                                                                            |
| 5        | NeuAca(2-3)6-O-sulfo-Gal $\beta$ (1-4)GlcNAc $\beta$ -ethyl-NH <sub>2</sub>                                                                                                                                                                                                                                                                                        |
| 6        | NeuAca(2-3)6-O-sulfo-Gal $\beta$ (1-4)[Fuca(1-3)]GlcNAc $\beta$ -propyl-NH <sub>2</sub>                                                                                                                                                                                                                                                                            |
| 7        | NeuAca(2-3)Gal $\beta$ (1-3)6-O-sulfo-GlcNAc $\beta$ -propyl-NH <sub>2</sub>                                                                                                                                                                                                                                                                                       |
| 8        | NeuAca(2-3)Gal $\beta$ (1-4)Glc $\beta$ -ethyl-NH <sub>2</sub>                                                                                                                                                                                                                                                                                                     |
| 9        | NeuAca(2-3)Gal $\beta$ (1-4)GlcNAc $\beta$ -ethyl-NH <sub>2</sub>                                                                                                                                                                                                                                                                                                  |
| 10       | NeuAca(2-3)Gal $\beta$ (1-4)GlcNAc $\beta$ (1-3)Gal $\beta$ (1-4)GlcNAc $\beta$ -ethyl-NH <sub>2</sub>                                                                                                                                                                                                                                                             |
| 11       | NeuAca(2-3)Gal $\beta$ (1-4)GlcNAc $\beta$ (1-3)Gal $\beta$ (1-4)GlcNAc $\beta$ (1-3)Gal $\beta$ (1-4)GlcNAc $\beta$ -ethyl-NH <sub>2</sub>                                                                                                                                                                                                                        |
| 12       | NeuAca(2-3)GalNAc $\beta$ (1-4)GlcNAc $\beta$ -ethyl-NH <sub>2</sub>                                                                                                                                                                                                                                                                                               |
| 13       | NeuAca(2-3)Gal $\beta$ (1-3)GlcNAc $\beta$ -ethyl-NH <sub>2</sub>                                                                                                                                                                                                                                                                                                  |
| 14       | NeuAca(2-3)Gal $\beta$ (1-3)GlcNAc $\beta$ (1-3)Gal $\beta$ (1-4)GlcNAc $\beta$ -ethyl-NH <sub>2</sub>                                                                                                                                                                                                                                                             |
| 15       | NeuAca(2-3)Gal $\beta$ (1-3)GlcNAc $\beta$ (1-3)Gal $\beta$ (1-3)GlcNAc $\beta$ -ethyl-NH <sub>2</sub>                                                                                                                                                                                                                                                             |
| 16       | NeuAca(2-3)Gal $\beta$ (1-3)GalNAc $\beta$ (1-3)Gal $\alpha$ (1-4)Gal $\beta$ (1-4)Glc $\beta$ -ethyl-NH <sub>2</sub>                                                                                                                                                                                                                                              |
| 17       | NeuAca(2-3)Gal $\beta$ (1-3)GalNAc $\alpha$ -Thr-NH <sub>2</sub>                                                                                                                                                                                                                                                                                                   |
| 18       | NeuAca(2-3)Gal $\beta$ (1-3)[GlcNAc $\beta$ (1-6)]GalNAc $\alpha$ -Thr-NH <sub>2</sub>                                                                                                                                                                                                                                                                             |
| 19       | NeuAca(2-3)Gal $\beta$ (1-4)GlcNAc $\beta$ (1-6)[Gal $\beta$ (1-3)]GalNAc $\alpha$ -Thr-NH <sub>2</sub>                                                                                                                                                                                                                                                            |
| 20       | NeuAca(2-3)Gal $\beta$ (1-4)GlcNAc $\beta$ (1-3)Gal $\beta$ (1-4)GlcNAc $\beta$ (1-6)[Gal $\beta$ (1-3)]GalNAc $\alpha$ -Thr-NH <sub>2</sub>                                                                                                                                                                                                                       |
| 21       | NeuAca(2-3)Gal $\beta$ (1-4)GlcNAc $\beta$ (1-3)GalNAc $\alpha$ -Thr-NH <sub>2</sub>                                                                                                                                                                                                                                                                               |
| 22       | NeuAca(2-3)Gal $\beta$ (1-4)GlcNAc $\beta$ (1-3)Gal $\beta$ (1-4)GlcNAc $\beta$ (1-3)GalNAc $\alpha$ -Thr-NH <sub>2</sub>                                                                                                                                                                                                                                          |
| 23       | NeuAca(2-3)Gal $\beta$ (1-4)GlcNAc $\beta$ (1-3)[NeuAca(2-3)Gal $\beta$ (1-4)GlcNAc $\beta$ (1-6)]GalNAc $\alpha$ -Thr-NH <sub>2</sub>                                                                                                                                                                                                                             |
| 24       | NeuAca(2-3)Gal $\beta$ (1-4)GlcNAc $\beta$ (1-3)Gal $\beta$ (1-4)GlcNAc $\beta$ (1-3)[NeuAca(2-3)Gal $\beta$ (1-4)GlcNAc $\beta$ (1-3)Gal $\beta$ (1-4)GlcNAc $\beta$ (1-6)]GalNAc $\alpha$ -Thr-NH <sub>2</sub>                                                                                                                                                   |
| 25       | NeuAca(2-3)Gal $\beta$ (1-4)GlcNAc $\beta$ (1-2)Man $\alpha$ (1-3)[NeuAca(2-3)Gal $\beta$ (1-4)GlcNAc $\beta$ (1-2)Man $\alpha$ (1-6)]Man $\beta$ (1-4)GlcNAc $\beta$ (1-4)GlcNAc $\beta$ -Asn-NH <sub>2</sub>                                                                                                                                                     |
| 26       | NeuAca(2-3)Gal $\beta$ (1-4)GlcNAc $\beta$ (1-3)Gal $\beta$ (1-4)GlcNAc $\beta$ (1-2)Man $\alpha$ (1-3)[NeuAca(2-3)Gal $\beta$ (1-4)GlcNAc $\beta$ (1-3)Gal $\beta$ (1-4)GlcNAc $\beta$ (1-2)Man $\alpha$ (1-6)]Man $\beta$ (1-4)GlcNAc $\beta$ (1-4)GlcNAc $\beta$ -Asn-NH <sub>2</sub>                                                                           |
| 27       | NeuAca(2-3)Gal $\beta$ (1-4)GlcNAc $\beta$ (1-3)Gal $\beta$ (1-4)GlcNAc $\beta$ (1-3)Gal $\beta$ (1-4)GlcNAc $\beta$ (1-2)Man $\alpha$ (1-3)[NeuAca(2-3)Gal $\beta$ (1-4)GlcNAc $\beta$ (1-3)Gal $\beta$ (1-4)GlcNAc $\beta$ (1-3)Gal $\beta$ (1-4)GlcNAc $\beta$ (1-2)Man $\alpha$ (1-6)]Man $\beta$ (1-4)GlcNAc $\beta$ (1-4)GlcNAc $\beta$ -Asn-NH <sub>2</sub> |
| 28       | NeuAca(2-3)[GalNAc $\beta$ (1-4)]Gal $\beta$ (1-4)GlcNAc $\beta$ -ethyl-NH <sub>2</sub>                                                                                                                                                                                                                                                                            |
| 29       | NeuAca(2-3)[GalNAc $\beta$ (1-4)]Gal $\beta$ (1-4)Glc $\beta$ -ethyl-NH <sub>2</sub>                                                                                                                                                                                                                                                                               |
| 30       | Gal $\beta$ (1-3)GalNAc $\beta$ (1-4)[NeuAca(2-3)]Gal $\beta$ (1-4)Glc $\beta$ -ethyl-NH <sub>2</sub>                                                                                                                                                                                                                                                              |
| 31       | NeuAca(2-3)Gal $\beta$ (1-4)[Fuca(1-3)]GlcNAc $\beta$ -propyl-NH <sub>2</sub>                                                                                                                                                                                                                                                                                      |
| 32       | NeuAca(2-3)Gal $\beta$ (1-3)[Fuca(1-4)]GlcNAc $\beta$ (1-3)Gal $\beta$ (1-4)[Fuca(1-3)]GlcNAc $\beta$ -ethyl-NH <sub>2</sub>                                                                                                                                                                                                                                       |
| 33       | NeuAca(2-3)Gal $\beta$ (1-4)[Fuca(1-3)]GlcNAc $\beta$ (1-3)Gal $\beta$ (1-4)[Fuca(1-3)]GlcNAc $\beta$ -ethyl-NH <sub>2</sub>                                                                                                                                                                                                                                       |
| 34       | NeuAca(2-3)Gal $\beta$ (1-4)[Fuca(1-3)]GlcNAc $\beta$ (1-3)Gal $\beta$ (1-4)[Fuca(1-3)]GlcNAc $\beta$ (1-3)Gal $\beta$ (1-4)[Fuca(1-3)]GlcNAc $\beta$ -ethyl-NH <sub>2</sub>                                                                                                                                                                                       |
| 35       | NeuGca(2-3)Gal $\beta$ (1-4)GlcNAc $\beta$ -ethyl-NH <sub>2</sub>                                                                                                                                                                                                                                                                                                  |
| 36       | NeuAca(2-6)Gal $\beta$ (1-4)6-O-sulfo-GlcNAc $\beta$ -propyl-NH <sub>2</sub>                                                                                                                                                                                                                                                                                       |
| 37       | NeuAca(2-6)Gal $\beta$ (1-4)Glc $\beta$ -ethyl-NH <sub>2</sub>                                                                                                                                                                                                                                                                                                     |
| 38       | NeuAca(2-6)Gal $\beta$ (1-4)GlcNAc $\beta$ -ethyl-NH <sub>2</sub>                                                                                                                                                                                                                                                                                                  |
| 39       | NeuAca(2-6)Gal $\beta$ (1-4)GlcNAc $\beta$ (1-3)Gal $\beta$ (1-4)GlcNAc $\beta$ -ethyl-NH <sub>2</sub>                                                                                                                                                                                                                                                             |
| 40       | NeuAca(2-6)Gal $\beta$ (1-4)GlcNAc $\beta$ (1-3)Gal $\beta$ (1-4)GlcNAc $\beta$ (1-3)Gal $\beta$ (1-4)GlcNAc $\beta$ -ethyl-NH <sub>2</sub>                                                                                                                                                                                                                        |
| 41       | NeuAca(2-6)Gal $\beta$ (1-4)GlcNAc $\beta$ (1-3)[NeuAca(2-6)]Gal $\beta$ (1-4)GlcNAc $\beta$ -ethyl-NH <sub>2</sub>                                                                                                                                                                                                                                                |
| 42       | NeuAca(2-6)GalNAc $\beta$ (1-4)GlcNAc $\beta$ -ethyl-NH <sub>2</sub>                                                                                                                                                                                                                                                                                               |

|    |                                                                                                                                                                                                                          |
|----|--------------------------------------------------------------------------------------------------------------------------------------------------------------------------------------------------------------------------|
| 43 | NeuAca(2-6)[Galβ(1-3)]GalNAca-Thr-NH <sub>2</sub>                                                                                                                                                                        |
| 44 | NeuAca(2-6)Galβ(1-4)GlcNAcβ(1-6)[Galβ(1-3)]GalNAca-Thr-NH <sub>2</sub>                                                                                                                                                   |
| 45 | NeuAca(2-6)Galβ(1-4)GlcNAcβ(1-3)Galβ(1-4)GlcNAcβ(1-6)[Galβ(1-3)]GalNAca-Thr-NH <sub>2</sub>                                                                                                                              |
| 46 | NeuAca(2-6)Galβ(1-4)GlcNAcβ(1-3)GalNAca-Thr-NH <sub>2</sub>                                                                                                                                                              |
| 47 | NeuAca(2-6)Galβ(1-4)GlcNAcβ(1-3)Galβ(1-4)GlcNAcβ(1-3)GalNAca-Thr-NH <sub>2</sub>                                                                                                                                         |
| 48 | NeuAca(2-6)Galβ(1-4)GlcNAcβ(1-3)[NeuAca(2-6)Galβ(1-4)GlcNAcβ(1-6)]GalNAca-Thr-NH <sub>2</sub>                                                                                                                            |
| 49 | NeuAca(2-6)Galβ(1-4)GlcNAcβ(1-3)Galβ(1-4)GlcNAcβ(1-3)[NeuAca(2-6)Galβ(1-4)GlcNAcβ(1-3)Galβ(1-4)GlcNAcβ(1-6)]GalNAca-Thr-NH <sub>2</sub>                                                                                  |
| 50 | Galβ(1-4)GlcNAcβ(1-2)Manα(1-3)[NeuAca(2-6)Galβ(1-4)GlcNAcβ(1-2)Manα(1-6)]Manβ(1-4)GlcNAcβ(1-4)GlcNAcβ-Asn-NH <sub>2</sub>                                                                                                |
| 51 | NeuAca(2-6)Galβ(1-4)GlcNAcβ(1-2)Manα(1-3)[Galβ(1-4)GlcNAcβ(1-2)Manα(1-6)]Manβ(1-4)GlcNAcβ(1-4)GlcNAcβ-Asn-NH <sub>2</sub>                                                                                                |
| 52 | GlcNAcβ(1-2)Manα(1-3)[NeuAca(2-6)Galβ(1-4)GlcNAcβ(1-2)Manα(1-6)]Manβ(1-4)GlcNAcβ(1-4)GlcNAcβ-Asn-NH <sub>2</sub>                                                                                                         |
| 53 | NeuAca(2-6)Galβ(1-4)GlcNAcβ(1-2)Manα(1-3)[NeuAca(2-6)Galβ(1-4)GlcNAcβ(1-2)Manα(1-6)]Manβ(1-4)GlcNAcβ(1-4)GlcNAcβ-Asn-NH <sub>2</sub>                                                                                     |
| 54 | NeuAca(2-6)Galβ(1-4)GlcNAcβ(1-3)Galβ(1-4)GlcNAcβ(1-2)Manα(1-3)[NeuAca(2-6)Galβ(1-4)GlcNAcβ(1-3)Galβ(1-4)GlcNAcβ(1-2)Manα(1-6)]Manβ(1-4)GlcNAcβ(1-4)GlcNAcβ-Asn-NH <sub>2</sub>                                           |
| 55 | NeuAca(2-6)Galβ(1-4)GlcNAcβ(1-3)Galβ(1-4)GlcNAcβ(1-3)Galβ(1-4)GlcNAcβ(1-2)Manα(1-3)[NeuAca(2-6)Galβ(1-4)GlcNAcβ(1-3)Galβ(1-4)GlcNAcβ(1-3)Galβ(1-4)GlcNAcβ(1-2)Manα(1-6)]Manβ(1-4)GlcNAcβ(1-4)GlcNAcβ-Asn-NH <sub>2</sub> |
| 56 | NeuGca(2-6)Galβ(1-4)GlcNAcβ-ethyl-NH <sub>2</sub>                                                                                                                                                                        |
| 57 | NeuAca(2-3)Galβ(1-4)GlcNAcβ(1-2)Manα(1-3)[NeuAca(2-6)Galβ(1-4)GlcNAcβ(1-2)Manα(1-6)]Manβ(1-4)GlcNAcβ(1-4)GlcNAcβ-Asn-NH <sub>2</sub>                                                                                     |
| 58 | NeuAca(2-6)Galβ(1-4)GlcNAcβ(1-2)Manα(1-3)[NeuAca(2-3)Galβ(1-4)GlcNAcβ(1-2)Manα(1-6)]Manβ(1-4)GlcNAcβ(1-4)GlcNAcβ-Asn-NH <sub>2</sub>                                                                                     |

**Supplementary Table S10. Virus titres in organs of infected miniature pigs<sup>a</sup>.**

| Animal ID           | Virus titres (log <sub>10</sub> PFU/g) of animals infected with: |     |       |     |          |     |
|---------------------|------------------------------------------------------------------|-----|-------|-----|----------|-----|
|                     | Anhui/1                                                          |     |       |     | Dk/GM466 |     |
|                     | Day 3                                                            |     | Day 6 |     | Day 3    |     |
|                     | #1                                                               | #2  | #3    | #4  | #5       | #6  |
| Nasal turbinates    | - <sup>b</sup>                                                   | 5.2 | 3.6   | 1.9 | -        | -   |
| Oro/nasopharynx     | -                                                                | -   | -     | -   | -        | -   |
| Tonsils             | -                                                                | -   | -     | -   | -        | -   |
| Trachea             | 2.5                                                              | -   | 4.1   | -   | -        | --  |
| Bronchus (right)    | 1.8                                                              | -   | -     | -   | -        | -   |
| Bronchus (left)     | -                                                                | -   | 3.5   | -   | 2.7      | -   |
| Lung (upper right)  | -                                                                | -   | 5.0   | -   | 6.0      | 4.5 |
| Lung (middle right) | -                                                                | -   | -     | -   | -        | -   |
| Lung (lower right)  | -                                                                | -   | -     | -   | -        | -   |
| Lung (upper left)   | -                                                                | -   | -     | -   | -        | -   |
| Lung (middle left)  | -                                                                | -   | -     | -   | -        | -   |
| Lung (lower left)   | -                                                                | -   | -     | -   | -        | -   |

<sup>a</sup>Specific-pathogen-free miniature pigs were intranasally infected with 10<sup>6</sup> PFU (1 ml) of virus. For virus titration, two animals from each group were euthanized at 3 dpi; the remaining two Anhui/1-inoculated pigs were euthanized at 6 dpi. No virus was recovered from mediastinal lymph nodes, heart, spleen, kidneys, liver, duodenum, ileum, jejunum, rectum, mesenteric lymph nodes, bladder, cerebrum, brain stem, feces, or urine.

<sup>b</sup>-, virus not detected (detection limit: 1.3 log<sub>10</sub> PFU/g).

**Supplementary Table S11. Virus titres in respiratory swabs from infected miniature pigs<sup>a</sup>.**

| Virus titres (log <sub>10</sub> PFU/g) in swab samples collected from animals infected with: |      |         |      |      |          |    |
|----------------------------------------------------------------------------------------------|------|---------|------|------|----------|----|
|                                                                                              |      | Anhui/1 |      |      | Dk/GM466 |    |
| Animal ID                                                                                    | #1   | #2      | #3   | #4   | #5       | #6 |
| Day 1                                                                                        | -    | -       | 3.08 | -    | -        | -  |
| Day 2                                                                                        | 1.00 | 2.18    | 3.70 | 1.78 | -        | -  |
| Day 3                                                                                        | 1.30 | 1.95    | 3.11 | -    | -        | -  |
| Day 4                                                                                        | /    | /       | 4.18 | -    | /        | /  |
| Day 5                                                                                        | /    | /       | 4.08 | 2.60 | /        | /  |
| Day 6                                                                                        | /    | /       | 3.00 | 2.49 | /        | /  |

<sup>a</sup>Specific-pathogen-free miniature pigs were intranasally infected with 10<sup>6</sup> PFU (1 ml) of virus. Nasal swabs were collected every day for 6 days for virus titration.

<sup>b</sup>-, virus not detected (detection limit: 1.3 log<sub>10</sub> PFU/ml).

Diagonal lines: not applicable, animals were euthanized at 3 days post-infection.



**Supplementary Table S12. Virus titres in organs of infected quails<sup>a</sup>.**

| Animal ID | Virus organ titres (log <sub>10</sub> PFU/g) of animals infected with: |     |     |                |    |     |          |     |     |       |     |     |
|-----------|------------------------------------------------------------------------|-----|-----|----------------|----|-----|----------|-----|-----|-------|-----|-----|
|           | Anhui/1                                                                |     |     |                |    |     | Dk/GM466 |     |     |       |     |     |
|           | Day 3                                                                  |     |     | Day 6          |    |     | Day 3    |     |     | Day 6 |     |     |
|           | #1                                                                     | #2  | #3  | #4             | #5 | #6  | #7       | #8  | #9  | #10   | #11 | #12 |
| Trachea   | 1.4                                                                    | 8.1 | 7.2 | - <sup>b</sup> | -  | 8.1 | 7.2      | 6.9 | 7.4 | -     | -   | -   |
| Lung      | -                                                                      | 2.6 | 2.6 | -              | -  | 6.3 | -        | -   | 4.7 | -     | -   | -   |
| Ileum     | -                                                                      | -   | -   | -              | -  | 4.0 | -        | -   | -   | -     | -   | -   |
| Cecum     | -                                                                      | -   | -   | 3              | -  | -   | -        | -   | -   | -     | -   | -   |
| Colon     | -                                                                      | -   | -   | -              | -  | -   | -        | -   | -   | -     | -   | -   |
| Brain     | -                                                                      | 2.7 | -   | -              | -  | -   | -        | -   | -   | -     | -   | -   |
| Spleen    | -                                                                      | -   | -   | -              | -  | -   | -        | -   | -   | -     | -   | -   |
| Kidney    | -                                                                      | -   | -   | -              | -  | 2.9 | -        | -   | 5.4 | -     | -   | -   |
| Liver     | -                                                                      | -   | -   | -              | -  | 3.3 | -        | -   | -   | -     | -   | -   |
| Heart     | -                                                                      | -   | -   | -              | -  | -   | -        | -   | -   | -     | -   | -   |

<sup>a</sup>Quails were intranasally infected with  $2 \times 10^6$  PFU (0.2 ml) of virus.

<sup>b</sup>-, virus not detected (detection limit: 1.3 log<sub>10</sub> PFU/ml).

**Supplementary Table S13. Virus titres in swabs from infected quails<sup>a</sup>.**

| Animal ID     |       | Virus titres (log <sub>10</sub> PFU/g) in swab samples collected from animals infected with: |     |     |                |     |     |          |     |     |     |     |     |
|---------------|-------|----------------------------------------------------------------------------------------------|-----|-----|----------------|-----|-----|----------|-----|-----|-----|-----|-----|
|               |       | Anhui/1                                                                                      |     |     |                |     |     | Dk/GM466 |     |     |     |     |     |
|               |       | #1                                                                                           | #2  | #3  | #4             | #5  | #6  | #7       | #8  | #9  | #10 | #11 | #12 |
| Tracheal swab | Day 1 | 5.2                                                                                          | 4.3 | 3.3 | 4.2            | 5.1 | 4.4 | 3.5      | 3.2 | 4.3 | 3.6 | 5.2 | 4.7 |
|               | Day 2 | 2.6                                                                                          | 4.5 | 4.2 | 4.5            | 5.4 | 3.9 | 4.1      | 4.3 | 4.4 | 2.0 | 3.4 | 4.0 |
|               | Day 3 | 4.6                                                                                          | 5.5 | 4.7 | 4.2            | 3.5 | 4.7 | 4.0      | 4.7 | 4.6 | 2.0 | 5.7 | 4.6 |
|               | Day 4 | /                                                                                            | /   | /   | 3.9            | 3.5 | 4.9 | /        | /   | /   | 2.9 | 4.7 | 5.1 |
|               | Day 5 | /                                                                                            | /   | /   | - <sup>b</sup> | -   | 4.2 | /        | /   | /   | 1.3 | 1.5 | 3.1 |
|               | Day 6 | /                                                                                            | /   | /   | -              | -   | 6.0 | /        | /   | /   | -   | -   | -   |
| Cloacal swab  | Day 1 | -                                                                                            | -   | -   | -              | -   | -   | -        | -   | -   | -   | -   | -   |
|               | Day 2 | -                                                                                            | -   | -   | -              | -   | -   | -        | -   | -   | -   | -   | -   |
|               | Day 3 | -                                                                                            | -   | -   | -              | -   | -   | -        | -   | -   | -   | -   | -   |
|               | Day 4 | /                                                                                            | /   | /   | -              | -   | 5.2 | /        | /   | /   | -   | -   | -   |
|               | Day 5 | /                                                                                            | /   | /   | -              | -   | 5.0 | /        | /   | /   | -   | -   | -   |
|               | Day 6 | /                                                                                            | /   | /   | -              | 3.4 | -   | /        | /   | /   | -   | -   | -   |

<sup>a</sup>Quails were intranasally infected with  $2 \times 10^6$  PFU (0.2 ml) of virus. Tracheal and cloacal swabs were collected every day for 6 days for virus titration.

<sup>b</sup>-, virus not detected (detection limit: 1.3 log<sub>10</sub> PFU/ml).

Diagonal lines: not applicable, animals were euthanized at 3 days post-infection.

**Supplementary Table S14. Virus titres in organs of infected chickens<sup>a</sup>.**

| Animal ID | Virus organ titres (log <sub>10</sub> PFU/g) of animals infected with: |     |     |                |    |    |          |     |     |       |     |     |
|-----------|------------------------------------------------------------------------|-----|-----|----------------|----|----|----------|-----|-----|-------|-----|-----|
|           | Anhui/1                                                                |     |     |                |    |    | Dk/GM466 |     |     |       |     |     |
|           | Day 3                                                                  |     |     | Day 6          |    |    | Day 3    |     |     | Day 6 |     |     |
|           | #1                                                                     | #2  | #3  | #4             | #5 | #6 | #7       | #8  | #9  | #10   | #11 | #12 |
| Trachea   | 0.7 <sup>b</sup>                                                       | 3.2 | 5.5 | - <sup>c</sup> | -  | -  | 3.9      | -   | -   | -     | -   | -   |
| Lung      | - <sup>b</sup>                                                         | -   | 3.5 | -              | -  | -  | -        | -   | 2.0 | -     | -   | -   |
| Ileum     | -                                                                      | -   | -   | -              | -  | -  | -        | -   | 4.4 | -     | -   | -   |
| Cecum     | -                                                                      | -   | -   | -              | -  | -  | -        | 2.2 | -   | -     | -   | 1.9 |
| Colon     | -                                                                      | -   | -   | -              | -  | -  | -        | -   | 4.6 | -     | -   | -   |
| Brain     | -                                                                      | -   | -   | -              | -  | -  | -        | -   | -   | -     | -   | -   |
| Spleen    | -                                                                      | -   | -   | -              | -  | -  | -        | -   | -   | -     | -   | -   |
| Kidney    | -                                                                      | -   | -   | -              | -  | -  | -        | -   | 5.4 | -     | -   | -   |
| Liver     | -                                                                      | -   | -   | -              | -  | -  | -        | -   | -   | -     | -   | -   |
| Heart     | -                                                                      | -   | -   | -              | -  | -  | -        | -   | 2.0 | -     | -   | -   |

<sup>a</sup>Chickens were intranasally infected with  $2 \times 10^6$  PFU (0.2 ml) of virus.

<sup>b</sup>The detection limit for tracheal and lung samples collected from animal #1 is 0.4 log<sub>10</sub> PFU/ml.

<sup>c</sup>-, virus not detected (detection limit: 1.3 log<sub>10</sub> PFU/ml).

**Supplementary Table S15. Virus titres in swabs from infected chickens<sup>a</sup>.**

| Animal ID     |       | Virus titres (log <sub>10</sub> PFU/g) in swab samples collected from animals infected with: |     |     |     |     |     |          |     |     |     |     |     |     |
|---------------|-------|----------------------------------------------------------------------------------------------|-----|-----|-----|-----|-----|----------|-----|-----|-----|-----|-----|-----|
|               |       | Anhui/1                                                                                      |     |     |     |     |     | Dk/GM466 |     |     |     |     |     |     |
|               |       | #1                                                                                           | #2  | #3  | #4  | #5  | #6  | #7       | #8  | #9  | #10 | #11 | #12 |     |
| Tracheal swab | Day 1 | -                                                                                            | 1.0 | 2.0 | 2.2 | 1.3 | 1.0 | 2.5      | 2.0 | 2.4 | 1.3 | 1.3 | 3.8 |     |
|               | Day 2 | 2.5                                                                                          | 2.5 | 4.6 | 3.3 | -   | 3.3 | 2.4      | -   | 1.3 | -   | -   | 1.0 |     |
|               | Day 3 | 5.3                                                                                          | -   | 5.4 | -   | -   | 2.6 | 1.0      | -   | -   | -   | 1.0 | -   |     |
|               | Day 4 | /                                                                                            | /   | /   | /   | -   | -   | 2.6      | /   | /   | /   | 1.3 | -   | 1.0 |
|               | Day 5 | /                                                                                            | /   | /   | /   | -   | -   | -        | /   | /   | /   | -   | 1.5 | -   |
|               | Day 6 | /                                                                                            | /   | /   | /   | -   | -   | -        | /   | /   | /   | -   | -   | -   |
|               | Day 1 | -                                                                                            | -   | -   | -   | -   | -   | -        | -   | -   | -   | -   | -   | -   |
| Cloacal swab  | Day 2 | -                                                                                            | -   | -   | -   | -   | -   | -        | -   | -   | -   | -   | -   |     |
|               | Day 3 | -                                                                                            | -   | -   | -   | -   | -   | -        | -   | 1.9 | -   | -   | -   |     |
|               | Day 4 | /                                                                                            | /   | /   | /   | -   | -   | -        | /   | /   | /   | -   | -   |     |
|               | Day 5 | /                                                                                            | /   | /   | /   | -   | -   | -        | /   | /   | /   | -   | -   |     |
|               | Day 6 | /                                                                                            | /   | /   | /   | -   | -   | -        | /   | /   | /   | -   | -   |     |
|               | Day 5 | /                                                                                            | /   | /   | /   | -   | -   | -        | /   | /   | /   | -   | -   |     |
|               | Day 6 | /                                                                                            | /   | /   | /   | -   | -   | -        | /   | /   | /   | -   | -   |     |

<sup>a</sup>Chickens were intranasally infected with  $2 \times 10^6$  PFU (0.2 ml) of virus. Tracheal and cloacal swabs were collected every day for virus titration.

<sup>b</sup>-, virus not detected (detection limit: 1.3 log<sub>10</sub> PFU/ml).

Diagonal lines: not applicable, animals were euthanized at 3 days post-infection.

**Supplementary Table S16. *In vitro* virus sensitivity to NA inhibitors.**

|                                      | IC <sub>50</sub> value <sup>a</sup> |            |                                 |                                 |
|--------------------------------------|-------------------------------------|------------|---------------------------------|---------------------------------|
|                                      | Anhui/1                             | Shanghai/1 | Shanghai/1-NA-292K <sup>b</sup> | Shanghai/1-NA-292R <sup>b</sup> |
| Oseltamivir carboxylate <sup>c</sup> | 0.49                                | 0.47       | 5403.50                         | 0.16                            |
| Zanamivir                            | 0.65                                | 1.32       | 15.50                           | 0.32                            |
| Laninamivir <sup>d</sup>             | 0.83                                | 0.93       | 12.93                           | 0.53                            |
| Peramivir                            | 0.09                                | 0.22       | 245.80                          | 0.06                            |

<sup>a</sup>IC<sub>50</sub> value: mean nM of duplicate reactions.

<sup>b</sup>Plaque-purified Shanghai/1 with either NA292K or NA292R.

<sup>c</sup>Oseltamivir carboxylate is the active form of oseltamivir.

<sup>d</sup>Laninamivir is the active form of laninamivir octanoate.

**Supplementary Table S17. Effect of different ratios of NA-292R and NA292K variants on *in vitro* sensitivity to NA inhibitors.**

| Oseltamivir-sensitive virus (%) <sup>b</sup> | IC <sub>50</sub> value <sup>a</sup>  |           |                          |           |
|----------------------------------------------|--------------------------------------|-----------|--------------------------|-----------|
|                                              | Oseltamivir carboxylate <sup>c</sup> | Zanamivir | Laninamivir <sup>d</sup> | Peramivir |
| 0                                            | 5403.50                              | 15.50     | 12.93                    | 245.80    |
| 10                                           | 3394.88                              | 6.56      | 4.21                     | 27.69     |
| 20                                           | 130.33                               | 3.87      | 2.47                     | 8.54      |
| 30                                           | 6.57                                 | 1.87      | 1.40                     | 0.89      |
| 40                                           | 0.77                                 | 1.17      | 1.25                     | 0.07      |
| 50                                           | 0.28                                 | 0.81      | 0.79                     | 0.05      |
| 60                                           | 0.23                                 | 0.56      | 0.76                     | 0.04      |
| 70                                           | 0.18                                 | 0.44      | 0.59                     | 0.04      |
| 80                                           | 0.15                                 | 0.40      | 0.56                     | 0.05      |
| 90                                           | 0.15                                 | 0.31      | 0.56                     | 0.06      |
| 100                                          | 0.16                                 | 0.32      | 0.53                     | 0.06      |

<sup>a</sup>IC<sub>50</sub> value: mean nM of duplicate reactions.

<sup>b</sup>Shanghai/1-NA292R and Shanghai/1-NA292K were mixed at different ratios (based on PFU) and tested for sensitivity to antiviral compounds.

<sup>c</sup>Oseltamivir carboxylate is the active form of oseltamivir.

<sup>d</sup>Laninamivir is the active form of laninamivir octanoate.



**Supplementary Table S18. Antigenic characterization of H7 viruses by use of monoclonal and polyclonal antibodies.**

| Virus                                    | Mouse monoclonal antibody against: |      |        |                                     |        |                                   |      |      |      | Goat polyclonal antibody against HA from Netherlands/219/03 (H7N7) |
|------------------------------------------|------------------------------------|------|--------|-------------------------------------|--------|-----------------------------------|------|------|------|--------------------------------------------------------------------|
|                                          | HA from A/Seal/Mass/1/88 (H7N7)    |      |        | HA from A/Netherlands/219/03 (H7N7) |        | HA from A/FPV/Rostock/1934 (H7N1) |      |      |      |                                                                    |
|                                          | 46/6                               | 46/2 | 55/3   | B1275m                              | B1273m | 127-10023                         | 10H9 | 9A9  | 1H11 |                                                                    |
| A/Ruddy turnstone/DE/2372/88 (H7N7)      | 4000                               | 2000 | 8000   | -                                   | -      | -                                 | -    | -    | -    | 2000                                                               |
| A/Turkey/Oregon/71 (H7N3)                | 4000                               | 2000 | 4000   | -                                   | -      | -                                 | -    | 2000 | -    | 4000                                                               |
| A/Turkey/PV/1/81 (H7N7)                  | <sup>b</sup>                       | -    | -      | -                                   | -      | -                                 | -    | -    | -    | -                                                                  |
| A/Ruddy Turnstone/DE/2770/87 (H7N5)      | -                                  | -    | -      | -                                   | -      | -                                 | -    | -    | -    | -                                                                  |
| A/African starling/England/983/79 (H7N1) | 4000                               | 2000 | 8000   | -                                   | -      | -                                 | -    | -    | -    | 2000                                                               |
| A/Seal/Massachusetts/1/80 (H7N7)         | 4000                               | 2000 | 8000   | -                                   | -      | -                                 | -    | -    | -    | 2000                                                               |
| A/Equine/Prague/1/56 (H7N7)              | -                                  | -    | -      | 1000                                | -      | -                                 | -    | -    | -    | 2000                                                               |
| A/Duck/Hong Kong/301/78 (H7N2)           | -                                  | -    | 8000   | -                                   | -      | -                                 | -    | -    | -    | 1000                                                               |
| A/Mallard/Italy/229/05 (H7N7)            | 4000                               | 2000 | 8000   | -                                   | -      | -                                 | -    | 1000 | -    | 4000                                                               |
| A/Anhui/1/2013 (H7N9) Egg stock          | 2000                               | -    | 16000  | -                                   | 2000   | -                                 | -    | 1000 | -    | 4000                                                               |
| A/Anhui/1/2013 (H7N9) MDCK stock         | 4000                               | 1000 | >32000 | -                                   | 16000  | 1000                              | 1000 | 8000 | -    | 4000                                                               |
| A/Shanghai/1/2013 HA/PR8                 | 4000                               | -    | 8000   | -                                   | -      | -                                 | -    | -    | -    | 4000                                                               |
| A/Hangzhou/1/2013 HA/PR8                 | 4000                               | 1000 | 16000  | -                                   | 2000   | -                                 | -    | 1000 | -    | 4000                                                               |

<sup>a</sup>HI Two-fold serial dilutions of antibodies were mixed with the amount of virus equivalent to 8 haemagglutination units in 96-well U-bottom microtitre plates, followed by incubation at room temperature for 30 min. After an equal volume of 0.5% chicken red blood cells was added, the mixtures were gently mixed, and then incubated at room temperature for a further 45 min. HI titres were determined as the inverse of the highest antibody dilution that inhibited the haemagglutination.

<sup>b</sup>-, virus not detected (detection limit: 1,000 HI).

### **Supplementary References**

1. Liu, X. *et al.* Poor responses to oseltamivir treatment in a patient with influenza A (H7N9) virus infection. *Emerg Microbes & Infections* 2, e27 (2013).
